# Ethylene-mediated nitric oxide depletion pre-adapts plants to hypoxia stress

**Authors:** Sjon Hartman<sup>1</sup>, Zeguang Liu<sup>1</sup>, Hans van Veen<sup>1</sup>, Jorge Vicente<sup>2</sup>, Emilie Reinen<sup>1</sup>,  
Shanice Martopawiro<sup>1</sup>, Hongtao Zhang<sup>3</sup>, Nienke van Dongen<sup>1</sup>, Femke Bosman<sup>1</sup>, George W.  
Bassel<sup>4</sup>, Eric J.W. Visser<sup>5</sup>, Julia Bailey-Serres<sup>1,6</sup>, Frederica L. Theodoulou<sup>3</sup>, Kim H. Hebelstrup<sup>7</sup>,  
Daniel J. Gibbs<sup>4</sup>, Michael J. Holdsworth<sup>2\*</sup>, Rashmi Sasidharan<sup>1\*</sup> and Laurentius A.C.J.  
Voensenek<sup>1\*</sup>

## **Affiliations:**

<sup>1</sup> Plant Ecophysiology, Institute of Environmental Biology, Utrecht University, Padualaan 8,  
3584 CH, Utrecht, The Netherlands

<sup>2</sup> School of Biosciences, University of Nottingham, Loughborough, LE12 5RD, United  
Kingdom

<sup>3</sup> Plant Sciences Department, Rothamsted Research, Harpenden, AL5 2JQ, United Kingdom

<sup>4</sup> School of Biosciences, University of Birmingham, Edgbaston B15 2TT, United Kingdom

<sup>5</sup> Department of Experimental Plant Ecology, Institute for Water and Wetland Research,  
Radboud University Nijmegen, 6525 AJ, Nijmegen, the Netherlands

<sup>6</sup> Botany and Plant Sciences Department and Center for Plant Cell Biology, University of  
California, Riverside, California 92521, United States

<sup>7</sup> Department of Molecular Biology and Genetics, Aarhus University, Forsøgsvej 1, DK-4200  
Slagelse, Denmark

## 25 Abstract

26 **Timely perception of adverse environmental changes is critical for survival. Dynamic**  
27 **changes in gases are important cues for plants to sense environmental perturbations, such**  
28 **as submergence. In *Arabidopsis thaliana*, changes in oxygen and nitric oxide (NO) control**  
29 **the stability of ERFVII transcription factors. ERFVII proteolysis is regulated by the N-**  
30 **degron pathway and mediates adaptation to flooding-induced hypoxia. However, how**  
31 **plants detect and transduce early submergence signals remains elusive. Here we show that**  
32 **plants can rapidly detect submergence through passive ethylene entrapment and use this**  
33 **signal to pre-adapt to impending hypoxia. Ethylene can enhance ERFVII stability prior to**  
34 **hypoxia by increasing the NO-scavenger PHYTOGLOBIN1. This ethylene-mediated NO**  
35 **depletion and consequent ERFVII accumulation pre-adapts plants to survive subsequent**  
36 **hypoxia. Our results reveal the biological link between three gaseous signals for the**  
37 **regulation of flooding survival and identifies novel regulatory targets for early stress**  
38 **perception that could be pivotal for developing flood-tolerant crops.**

39

## 40 Introduction

41 The increasing frequency of floods due to climate change <sup>1</sup> has devastating effects on agricultural  
42 productivity worldwide <sup>2</sup>. Due to restricted gas diffusion underwater, flooded plants experience  
43 cellular oxygen (O<sub>2</sub>) deprivation (hypoxia) and survival strongly depends on molecular responses  
44 that enhance hypoxia tolerance <sup>2,3</sup>. In submerged plant tissues the limited gas diffusion causes  
45 passive ethylene accumulation. This rapid ethylene build-up can occur prior to the onset of  
46 severe hypoxia, making it a timely and reliable signal for submergence <sup>4,5</sup>. In several plant  
47 species, ethylene regulates adaptive responses to flooding involving morphological and  
48 anatomical modifications that prevent hypoxia <sup>5</sup>. Surprisingly, ethylene has so far not been  
49 linked to metabolic responses that reduce hypoxia damage. In addition, how plants detect and  
50 transduce early submergence signals to enhance survival remains elusive.

51 Here we show that plants can quickly detect submergence using passive ethylene accumulation  
52 and integrate this signal to acclimate to subsequent hypoxia. This ethylene-mediated hypoxia  
53 acclimation is dependent on enhanced ERFVII stability prior to hypoxia. We show that ethylene  
54 limits ERFVII proteolysis under normoxic conditions by increasing the NO-scavenger

55 PHYTOGLOBIN1. Our results reveal a molecular mechanism that plants use to integrate early  
56 stress signals to pre-adapt to forthcoming severe stress.

57

## 58 **Results**

### 59 **Early ethylene signalling enhances hypoxia acclimation**

60 To unravel the spatial and temporal dynamics of ethylene signalling upon plant submergence, we  
61 monitored the nuclear accumulation of ETHYLENE INSENSITIVE 3 (EIN3)<sup>6-9</sup>, an essential  
62 transcription factor for mediating ethylene responses. We show, through an increase in EIN3-  
63 GFP fluorescence signal, that ethylene is rapidly perceived (within 1-2 h) in *Arabidopsis*  
64 *thaliana* (hereafter *Arabidopsis*) root tips upon submergence (Supplementary Figure 1a-c). An  
65 ethylene or submergence pre-treatment of only 4 hours was sufficient to increase root meristem  
66 survival during subsequent hypoxia (<0.01% O<sub>2</sub>). These responses were abolished in ethylene  
67 signalling mutants or via chemical inhibition of ethylene action (Supplementary Figure 1d-e).  
68 Ethylene-induced adaptation to hypoxia was observed in both roots and shoots and was  
69 accompanied by a reduction in cellular damage in response to hypoxia (Fig. 1, Supplementary  
70 Figure 2 & 3). Furthermore, enhanced hypoxia tolerance after ethylene pre-treatment is  
71 conserved within *Arabidopsis* accessions and taxonomically diverse flowering plant species,  
72 although variation in capacity to benefit from an ethylene pre-treatment exists (Supplementary  
73 Figure 4; <sup>10</sup>). These results demonstrate that ethylene enhances tolerance of multiple plant organs  
74 and species to hypoxia. Next, we aimed to unravel how early ethylene signalling leads to  
75 enhanced hypoxia tolerance in *Arabidopsis* root tips.

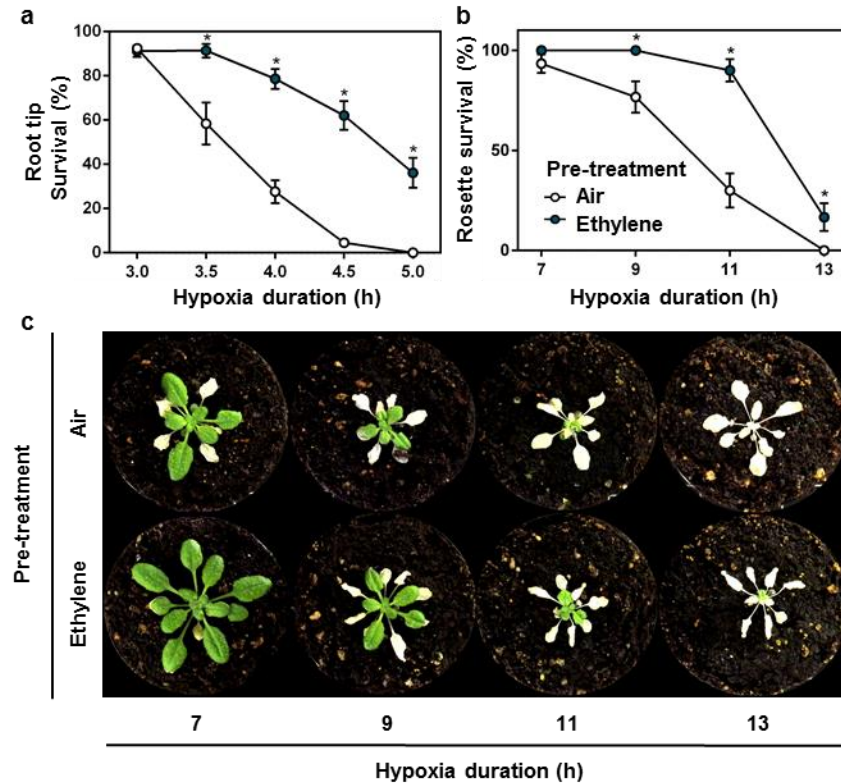

76

77

**Figure 1. Ethylene pre-treatment enhances hypoxia tolerance.**

78

(a, b) Arabidopsis (Col-0) seedling root tip (a) and adult rosette (b) survival after 4 hours of air (white) or  $\sim 5\mu\text{l l}^{-1}$  ethylene (blue) followed by hypoxia and recovery (3 days for root tips, 7 days for rosettes). Values are relative to control (normoxia) plants (mean  $\pm$  sem). Asterisks indicate significant differences between air and ethylene ( $p < 0.05$ ,

79

Generalized linear model, negative binomial error structure,  $n = 4-8$  lines consisting of  $\sim 23$  seedlings (a),  $n = 30$  plants

80

(b)). (c) Arabidopsis (Col-0) rosette phenotypes after 4 hours of pre-treatment (air/  $\sim 5\mu\text{l l}^{-1}$  ethylene) followed by hypoxia and 7 days recovery. All experiments were replicated at least 3 times.

81

82

83

84

85

**Ethylene stabilizes group VII Ethylene Response Factors**

86

Hypoxia acclimation in plants involves the up-regulation of hypoxia adaptive genes that control energy maintenance and oxidative stress homeostasis<sup>11</sup>. Interestingly, most of these genes were

87

not induced by ethylene alone, but showed increased transcript abundance upon hypoxia following a pre-treatment with ethylene (Supplementary Figure 5). Hypoxia adaptive genes are

88

regulated by group VII Ethylene Response Factor transcription factors (ERFVIIIs) that are components of a mechanism that senses  $\text{O}_2$  and  $\text{NO}$  via the Cys-branch of the PROTEOLYSIS 6

89

(PRT6) N-degron pathway<sup>12-14</sup>. ERFVIIIs are degraded following oxidation of amino terminal (Nt-) Cysteine in the presence of oxygen and  $\text{NO}$ , catalysed by PLANT CYSTEINE OXIDASEs

90

91

92

93

94 (PCOs)<sup>15</sup>. The N-recognin E3 ligase PRT6 promotes degradation of oxidized ERFVIIIs by the  
 95 26S proteasome<sup>16,17</sup>. A decline in either O<sub>2</sub> or NO stabilizes ERFVIIIs, leading to transcriptional  
 96 up-regulation of hypoxia adaptive genes and other environmental and developmental responses  
 97 <sup>12,14,18,19</sup>. The constitutively synthesized ERFVIIIs RELATED TO APETALA2.12 (RAP2.12),  
 98 RAP2.2 and RAP2.3 redundantly act as the principal activators of many hypoxia adaptive genes  
 99 <sup>20–22</sup>. In contrast, HYPOXIA RESPONSIVE ERF1 (HRE1) and HRE2 function downstream of  
 100 RAP-type ERFVIIIs, being transcriptionally induced once hypoxia occurs<sup>23</sup>. We investigated  
 101 whether ethylene-induced hypoxia tolerance depends on the constitutively synthesized RAP-type  
 102 ERFVIIIs. Single loss-of-function mutants of *RAP2.12*, *RAP2.2* and *RAP2.3*, and the *hre1 hre2*  
 103 double mutant, responded to ethylene pre-treatment similarly to their WT backgrounds  
 104 (Supplementary Figure 6a). However, two independent *rap2.2 rap2.12* loss-of-function double  
 105 mutants<sup>21</sup> showed no improved hypoxia tolerance after ethylene pre-treatment (Fig. 2a), while  
 106 their WT background crosses did (Supplementary Figure 6b). In contrast, overexpression of a  
 107 stable N-terminal variant of RAP2.12<sup>22</sup>, or inhibition of the PRT6 N-degron pathway in the  
 108 *prt6-1* mutant<sup>12,24</sup> both enhanced hypoxia tolerance without an ethylene pre-treatment (Fig. 2a).  
 109 These data indicate that ethylene-induced hypoxia tolerance occurs through the PRT6 N-degron  
 110 pathway and redundantly involves at least RAP2.2 and RAP2.12.<sup>21,22</sup>

111

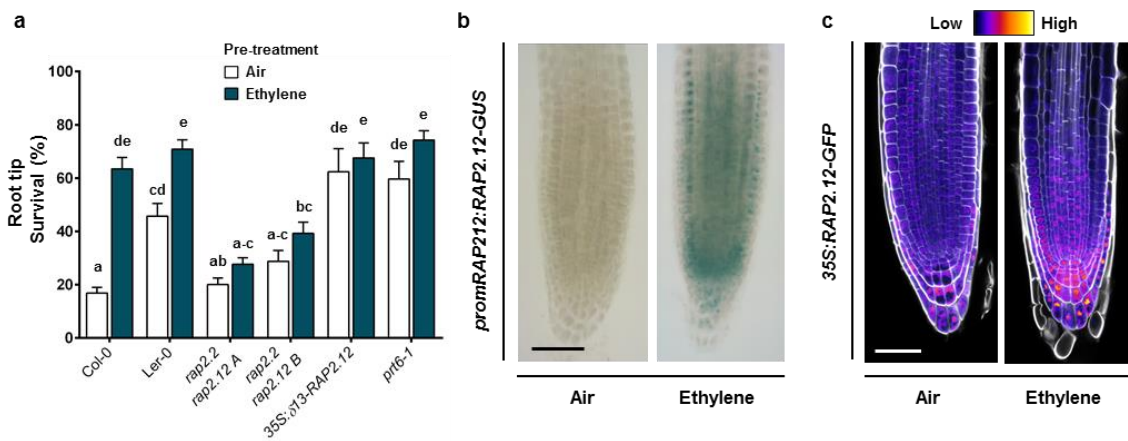

112

113 **Figure 2. Ethylene-induced hypoxia tolerance is regulated by RAP-type ERFVIIIs.**

114 (a) Seedling root tip survival of Col-0, Ler-0, *rap2.2 rap2.12* (2 independent lines in Col-0 x Ler-0 background), a  
 115 constitutively expressed stable version of RAP2.12 and N-degron pathway mutant *prt6-1* after 4 hours air or ~5μl<sup>-1</sup>  
 116 ethylene followed by 4 hours of hypoxia and 3 days recovery. Values are relative to control (normoxia) plants (mean  
 117 ± sem). Statistically similar groups are indicated using the same letter (p<0.05, 2-way ANOVA, Tukey's HSD,  
 118 n=20-28 lines consisting of ~23 seedlings). (b) and (c) Representative root tip images showing

119 *promRAP2.12::RAP2.12-GUS* staining and confocal images of *35S::RAP2.12-GFP* intensity in root tips after 4  
120 hours of air or  $\sim 5\mu\text{l}^{-1}$  ethylene. Cell walls were visualized using Calcofluor White stain (c). Scale bar of b and c is  
121 50 $\mu\text{m}$ . All experiments were replicated at least 3 times.

122

123 We next explored how ethylene regulates *ERFVII* mRNA and protein abundance. Ethylene  
124 increased *RAP2.2*, *RAP2.3*, *HRE1* and *HRE2* transcripts in root tips and *RAP2.12*, *RAP2.2* and  
125 *RAP2.3* mRNAs in shoots (Supplementary Figure 6c-d). Visualization and quantification of  
126 *RAP2.12* abundance using transgenic *promRAP2.12::RAP2.12-GUS* and *35S::RAP2.12-GFP*  
127 protein-fusion lines revealed that ethylene strongly increased *RAP2.12* protein in meristematic  
128 zones of main and lateral root tips and shoots under normoxia (Fig. 2b-c, Supplementary Figure  
129 6e-f). Since *35S::RAP2.12-GFP* is uncoupled from ethylene-triggered transcription, this suggests  
130 that ethylene limits *ERFVII* protein turnover. In root tips, this *RAP2.12* stabilization appeared  
131 within nuclei across most cell types and was also independent of ethylene-enhanced *RAP2.12*  
132 transcript abundance (Fig 2b-c, Supplementary Figure 6c, e-f). These data suggest that ethylene-  
133 enhanced *ERFVII* accumulation is regulated by post-translational processes.

134

### 135 **Ethylene limits *ERFVII* proteolysis through NO depletion**

136 To investigate enhanced *ERFVII* stability under ambient  $\text{O}_2$ , we studied the effect of ethylene on  
137 the expression of genes encoding PRT6 N-degron pathway enzymes or other mechanisms  
138 reported to influence *ERFVII* stability. In response to ethylene, none of these genes showed  
139 changes in transcript abundance (Supplementary Figure 7a-b). In addition, as both  $\text{O}_2$  and NO  
140 promote *ERFVII* proteolysis<sup>17</sup>, and since ethylene was administered at ambient  $\text{O}_2$  conditions  
141 (21%; normoxia) and did not lead to hypoxia in desiccators (Supplementary Figure 7c), it is  
142 unlikely that hypoxia causes the observed *ERFVII* stabilization. Furthermore, while recent  
143 reports show that plants contain a hypoxic niche in shoot apical meristems and lateral root  
144 primordia<sup>25,26</sup>, we did not observe enhanced hypoxia target gene expression in root tips exposed  
145 ethylene treatments (Supplementary Figure 5), ruling out ethylene-enhanced local hypoxia in  
146 these tissues.

147 Since NO was previously shown to control proteolysis of *ERFVII*s and other  $\text{Met}_1\text{-Cys}_2$  N-  
148 degron targets<sup>14,19,27</sup>, we hypothesized that ethylene may regulate NO levels. Roots treated with  
149 the NO probe 4-Amino-5-Methylamino-2',7'-Difluorofluorescein (DAF-FM) Diacetate  
150<sup>28</sup> revealed an ethylene-induced depletion in fluorescence, indicating that ethylene mediates NO

151 levels (Fig. 3a-b). Next, we investigated whether this decline in NO was required for RAP-type  
152 ERFVII stabilization. Both ethylene and the NO-scavenging compound 2-(4-Carboxyphenyl)-  
153 4,4,5,5-Tetramethylimidazoline-1-oxyl-3-oxide (cPTIO) led to increased RAP2.12 and RAP2.3  
154 stability under normoxia (Fig. 3c-e). However, the ethylene-mediated increase in RAP2.12 and  
155 RAP2.3 stability was abolished when an NO pulse was applied concomitantly confirming a role  
156 for NO depletion in ethylene-triggered ERFVII stabilization of both these RAPs during  
157 normoxia. Application of hypoxia after pre-treatments resulted in stabilization of RAP2.12 and  
158 RAP2.3, demonstrating that the plants were viable and the PRT6 N-degron pathway could still  
159 be impaired (Fig. 3c-e, Supplementary Figure 7d). These data together illustrate that both  
160 RAP2.12 and RAP2.3 depend on ethylene-mediated NO-depletion to promote their stability.  
161 The functional consequences of ethylene-induced NO-dependent RAP2.12 stabilization for  
162 hypoxia acclimation were studied in a root meristem survival assay. Ethylene pre-treatment  
163 enhanced hypoxia survival, which was largely abolished by an NO pulse (Fig. 3f). Furthermore,  
164 pre-treatment with cPTIO to scavenge intracellular NO before hypoxia resulted in increased  
165 survival in the absence of ethylene. In genotypes lacking RAP2.12 and RAP2.2 or  
166 overexpressing a stable N-terminal variant of RAP2.12, neither ethylene nor NO manipulation  
167 had any effect on subsequent hypoxia survival (Fig. 3f). These results demonstrate that local NO  
168 removal, via cPTIO or as a result of elevated ethylene, is both essential and sufficient to enhance  
169 RAP2.12 and RAP2.3 stability during normoxia, and that increased hypoxia tolerance conferred  
170 by ethylene strongly depends on NO-mediated stabilization of RAP2.12 and RAP2.2 prior to  
171 hypoxia.  
172

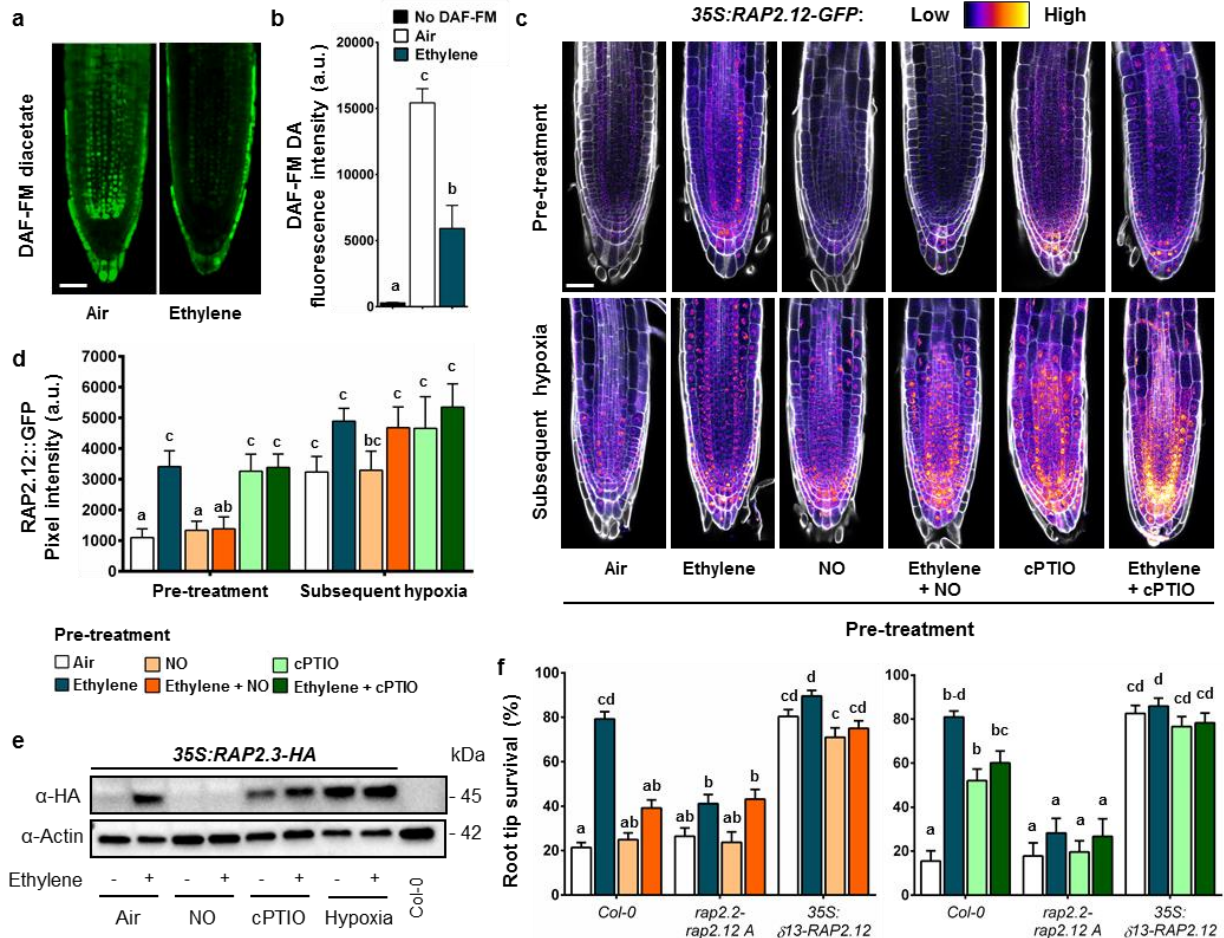

**Figure 3. Ethylene impairs NO levels leading to ERFVII stability and enhanced hypoxia survival.**

(a, b) Representative confocal images visualizing (a) and quantifying (b) NO, using fluorescent probe DAF-FM diacetate in Col-0 seedling root tips after 4 hours of air or  $\sim 5\mu\text{l}^{-1}$  ethylene (scale bar = 50 $\mu\text{m}$ ). (Letters indicate significant differences (1-way ANOVA, Tukey's HSD, n=5). (c, d) Representative confocal images visualizing (c) and quantifying (d) 35S::RAP2.12-GFP intensity in seedling root tips after indicated pre-treatments and subsequent hypoxia (4h). Cell walls were visualized using Calcofluor White stain (scale bar = 50 $\mu\text{m}$ ). (Letters indicate significant differences ( $p < 0.05$ , 2-way ANOVA, Tukey's HSD, n=5-7). (e) RAP2.3 protein levels in 35S::MC-RAP2.3-HA seedlings (Col-0 background) after indicated treatments. (f) Seedling root tip survival of Col-0, rap2.2 rap2.12 line A mutants and an over-expressed stable version of RAP2.12 after indicated pre-treatments followed by hypoxia (4h) and 3 days recovery. Values are relative to control (normoxia) plants. Letters indicate significant differences ( $p < 0.05$ , 2-way ANOVA, Tukey's HSD, n=12 rows consisting of  $\sim 23$  seedlings). All data shown are mean  $\pm$  sem. All experiments were replicated at least 3 times, except for c, d and f (2 times).

173

174

175

176

177

178

179

180

181

182

183

184

185

186

187

188

189



## 190 **Ethylene-mediated NO depletion is regulated by PHYTOGLOBIN1**

191 The question remained how ethylene regulates NO levels under normoxia. NO metabolism in  
192 Arabidopsis is mainly regulated by NO biosynthesis via NITRATE REDUCTASE (NR)-  
193 dependent nitrite reduction and NO-scavenging by three non-symbiotic phytooglobins (PGBs)<sup>29–</sup>  
194 <sup>31</sup>. Ethylene led to small increases in *NR1* and *NR2* mRNA levels, but this did not influence total  
195 NR activity (Supplementary Figure 8a, b&e). In contrast, transcript abundance of *PGB1*, the  
196 most potent NO-scavenger<sup>31</sup>, increased rapidly in root tips and shoots after ethylene treatment  
197 (Supplementary Figure 8a-c). Importantly, *PGB1* (a hypoxia-adaptive gene regulated by  
198 ERFVIIIs) was still up-regulated by ethylene during normoxia in *rap2.2 rap2.12* mutant lines  
199 (Supplementary Figure 8d). To study the effect of ethylene-induced *PGB1* levels on NO  
200 metabolism, ERFVII stabilization, hypoxia-adaptive gene expression and hypoxia tolerance, we  
201 identified a T-DNA insertion line (*SK\_058388*; hereafter *pgb1-1*). In *pgb1-1* the T-DNA is  
202 located 300 bp upstream of the *PGB1* start codon (Supplementary Figure 9a-b). In wild-type  
203 plants, both ethylene and hypoxia treatment enhanced *PGB1* transcript and protein accumulation  
204 (Fig. 4a-b). In *pgb1-1*, *PGB1* transcript levels were reduced, and ethylene did not increase *PGB1*  
205 transcript or protein abundance, whereas hypoxia only affected transcript abundance slightly  
206 (Fig. 4a-b). A faint band of lower molecular weight than expected for PGB1 (18 kDa) was  
207 observed in some *pgb1-1* samples, but did show any clear treatment effect (Fig 4b). Together  
208 these data illustrate that the T-DNA insertion in the promoter of *pgb1-1* uncouples *PGB1*  
209 expression from ethylene regulation. Conversely, a *35S:PGB1* line had constitutively elevated  
210 *PGB1* transcript and protein levels (Fig 4a-b,<sup>31</sup>). Importantly, both *pgb1-1* and *35S:PGB1*  
211 showed mostly similar ethylene responses in abundance of perception (*ETR2*) and biosynthesis  
212 (*ACO1*) transcripts compared to wild-type during normoxia (Supplementary Figure 10),  
213 indicating that ethylene biosynthesis and signalling are unlikely to be affected.

214 The ethylene-mediated NO decline observed in wild-type root tips was fully abolished in *pgb1-1*,  
215 demonstrating the requirement of *PGB1* induction for local NO removal upon ethylene exposure  
216 (Fig. 4c-d). Moreover, lack of NO removal by ethylene in *pgb1* resulted in the inability to  
217 stabilize RAP2.3 levels and reduced hypoxia survival (Fig. 4e-f). These effects could be rescued  
218 by restoration of NO-scavenging capacity using cPTIO (Fig. 4f). In addition, the reduced  
219 ethylene-induced hypoxia tolerance in *pgb1-1* was also accompanied by an absence of enhanced  
220 hypoxia adaptive gene expression after an ethylene pre-treatment (Supplementary Figure 10). In

221 contrast, *35S:PGBI* showed constitutively low NO levels in root tips (Fig. 4c, d, <sup>31</sup>), and  
222 increased RAP2.3 stability under normoxia (Fig. 4e). Moreover, ectopic *PGBI* over-expression  
223 enhanced hypoxia tolerance without an ethylene pre-treatment, but this effect was abolished by  
224 an NO pulse (Fig. 4f). Elevated mRNA levels for several hypoxia adaptive genes accompanied  
225 this constitutive hypoxia tolerance in *35S:PGBI* root tips (Supplementary Figure 10). These  
226 results demonstrate that active reduction of NO levels by ethylene-induced *PGBI* prior to  
227 hypoxia can precociously enhance ERFVII stability to prepare cells for impending hypoxia.

228

229

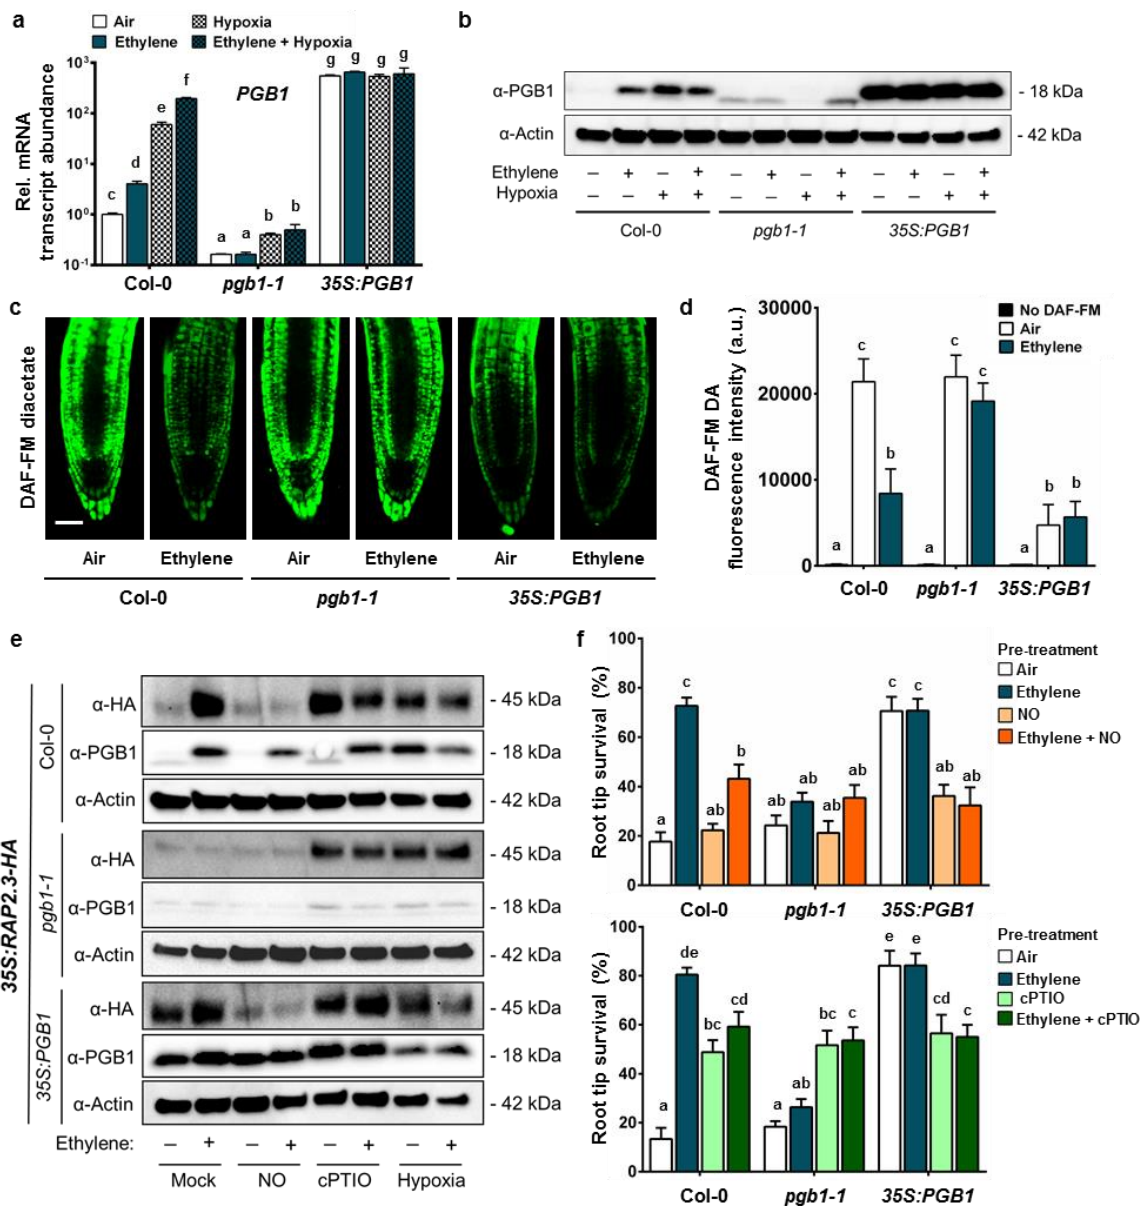

**Figure 4. Ethylene mediates NO levels, ERFVII stability and hypoxia survival through PHYTOGLOBIN1.**

(a) Relative transcript abundance of *PGB1* in root tips of Col-0, *pgb1-1* and 35S::*PGB1* after 4 h air or ~5μl<sup>-1</sup> ethylene followed by (4h) hypoxia. Values are relative to Col-0 air treated samples. Letters indicate significant differences (p<0.05, 2-way ANOVA, n=3 replicates of ~200 root tips each). (b) PGB1 protein levels in Col-0, *pgb1-1* and 35S::*PGB1* root tips after 4 h air or ~5μl<sup>-1</sup> ethylene followed by (4h) hypoxia. (c, d) Representative confocal images visualizing (C) and quantifying (D) NO using fluorescent probe DAF-FM diacetate in Col-0, *pgb1-1* and 35S::*PGB1* seedling root tips after 4h air or ~5μl<sup>-1</sup> ethylene (scale bar = 50μm). Letters indicate significant differences (p<0.05, 2-way ANOVA, Tukey's HSD, n=5) (e) RAP2.3 and PGB1 protein levels in 35S::*MC-RAP2.3-HA* (in Col-0, *pgb1-1* and 35S::*PGB1* background) seedling root tips after indicated pre-treatments and subsequent hypoxia (4h). (f) Seedling root tip survival of Col-0, *pgb1-1* and 35S::*PGB1* after indicated pre-treatments followed

230

231

232

233

234

235

236

237

238

239

240

241 by 4 h hypoxia and 3 days recovery. Values are relative to control (normoxia) plants. Letters indicate significant  
242 differences ( $p < 0.05$ , 2-way ANOVA, Tukey's HSD,  $n = 12$  rows of ~23 seedlings). All data shown are mean  $\pm$  sem.  
243 All experiments were replicated at least 2 times.

244

## 245 **Discussion**

246 We show that plants have the remarkable ability to detect submergence quickly by passive  
247 ethylene entrapment and use this signal to acclimate to forthcoming hypoxic conditions. The  
248 early ethylene signal prevents N-degron targeted ERFVII proteolysis by increased production of  
249 the NO-scavenger PGB1 and in turn primes the plant's hypoxia. Interestingly, while ethylene  
250 signalling prior to hypoxia leads to nuclear stabilization of RAP2.12 in root meristems (Fig. 2b-  
251 c, 3c), it does not trigger accumulation of most hypoxia adaptive gene transcripts until hypoxia  
252 occurs (Supplementary Figure 5). Apparently, stabilization of ERFVII alone is insufficient to  
253 trigger full activation of hypoxia-regulated gene transcription and additional hypoxia-specific  
254 signals such as altered ATP and/or  $Ca^{2+}$  levels are required<sup>32-34</sup>. The possible existence of  
255 undiscovered plant  $O_2$  sensors was recently discussed and could potentially fulfil this role<sup>35</sup>.  
256 Furthermore, the current discovery of ethylene-mediated stability of ERFVII paves the way  
257 towards unravelling how ethylene could influence the function of the other recently discovered  
258 PRT6 N-degron pathway targets VERNALIZATION2 (VRN2) and LITTLE ZIPPER2 (ZPR2)  
259<sup>25,27</sup>.

260 This study shows that PGB1 is a key intermediate, linking ethylene signalling, via regulated NO  
261 removal, to  $O_2$  sensing and hypoxia tolerance. This mechanism also provides a molecular  
262 explanation for the protective role of PGB1 during hypoxia and submergence described in prior  
263 studies<sup>31,36-38</sup>. Natural variation for ethylene-induced hypoxia adaptation was also observed in  
264 wild species and correlated with *PGB1* induction<sup>10</sup>. Our discovery provides an explanation for  
265 this natural variation and could be instrumental in enhancing conditional flooding tolerance in  
266 crops via manipulation of ethylene responsiveness of *PGB1* genes. In these modified plants,  
267 rapid passive ethylene entrapment upon flooding would increase PGB1 levels and pre-adapt  
268 crops to later occurring hypoxia stress.

269

270 **Methods**

271 **Plant material and growth conditions**

272 Plant material: *Arabidopsis thaliana* seeds of ecotypes Col-0, Cvi-0, C24 and mutants *ein2-5* and  
273 *ein3eill-1*<sup>39,40</sup> were obtained from the Nottingham Arabidopsis Stock Centre. Seeds of *pgb1-1*  
274 (SALK\_058388) were obtained from the Arabidopsis Biological Resource Center and the  
275 molecular characterization of this line is described in Fig. 4a-b and Supplementary Figure 9.  
276 Other germplines used in this study were kindly provided by the following individuals: Ler-0,  
277 *rap2.2-5* (Ler-0 background, AY201781/GT5336), *rap2.12-2* (SAIL\_1215\_H10), *rap2.2-*  
278 *5rap2.12-A* and *-B* (mixed Ler-0 and Col-0 background) from Prof. Angelika Mustroph<sup>21</sup>,  
279 University Bayreuth, Germany; *35S:δ13-RAP2.12-GFP* and *35S:RAP2.12-GFP* from Prof.  
280 Francesco Licausi, University of Pisa, Italy<sup>13</sup>; and *35S:EIN3-GFP* (*ein3eill* mutant background)  
281 from Prof. Shi Xiao, Sun Yat-sen University, China<sup>7</sup>. The *35S:PGB1*, *35S::RAP2.3-HA*  
282 transgenic lines, as well as *prt6-1* (SAIL\_1278\_H11), *rap2.3-1* (SAIL\_1031\_D10) and *hre1-*  
283 *lhre2-1* (SALK\_039484 + SALK\_052858) mutants were described previously<sup>12,14,41</sup>. Barley  
284 seeds were obtained from Flakkebjerg Research Center Seed Stock (Aarhus University).  
285 Additional mutant combinations used in this study were generated by crossing, and all lines were  
286 confirmed by either conventional genotyping PCRs and/or antibiotic resistance selection (Primer  
287 and additional info in Table S1).

288  
289 Growth conditions adult rosettes: *Arabidopsis* seeds were placed on potting soil (Primasta) in  
290 medium sized pots and stratified at 4°C in the dark for at least 3 days. Pots were then transferred  
291 to a growth chamber for germination under short day conditions (8:00 – 17:00, T= 20°C, Photon  
292 Flux Density = ~150 μmol m<sup>-2</sup>s<sup>-1</sup>, RH= 70%). After 7 days, seedlings were transplanted  
293 individually into single pots (70ml) that were filled with the similar potting soil (Primasta).  
294 Plants continued growing under identical short day conditions and were watered automatically to  
295 field capacity. Per genotype, homogeneous groups of 10-leaf-stage plants were selected and  
296 randomized over treatment groups for phenotypic and molecular analysis under various  
297 treatments. Plants used for these experiments were transferred back to the same conditions after  
298 treatments to recover for 7 days.

299 Growth conditions seedlings: Seeds were vapor sterilized by incubation with a beaker containing  
300 a mixture of 50 ml bleach and 3 ml of fuming HCl in a gas tight desiccator jar for 3 to 4 hours.

301 Seeds were then individually transplanted in (2 or 3) rows of 23 seeds on sterile square petri  
302 dishes containing 25 ml autoclaved and solidified ¼ MS, 1% plant agar without additional  
303 sucrose. Petri dishes were sealed with gas-permeable tape (Leukopor, Duchefa) and stratified at  
304 4°C in the dark for 3 to 4 days. Seedlings were grown vertically on the agar plates under short  
305 day conditions (9:00 – 17:00, T= 20°C, Photon Flux Density = ~120  $\mu\text{mol m}^{-2}\text{s}^{-1}$ , RH= 70%) for  
306 5 days for *Arabidopsis thaliana*, and 7 days for *Solanum lycopersicum* (Tomato, Moneymaker),  
307 *Solanum dulcamara* and *Arabidopsis lyrata* before phenotypic and/or molecular analysis under  
308 various treatments. For *Hordeum vulgare* (Barley, both ssp. Golden Promise and landrace  
309 Heimdal) seedlings were grown on agar in sterile tubs and were 3 days old before phenotypic  
310 analysis.

311

### 312 **Construction of transgenic plants.**

313 The *promRAP2.12:MC-RAP2.12-GUS* protein fusion lines were constructed by amplifying the  
314 genomic sequence capturing 2 kb of sequence upstream of the translational start site, and  
315 removing the stop codon using the following primers: RAP2.12-fwd GGGGACAAGTTTGTAC  
316 AAAAAAGCAGGCTATTCAGATTGGATCGTGACATG and RAP2.12-rev GGGGACCACT  
317 TTGTACAAGAAAGCTGGGTAGAAGACTCCTCCAATCATGGAAT. The PCR product was  
318 GATEWAY cloned into pDNR221 through a BP reaction, then transferred to pGWB433  
319 creating an in-frame C-terminal fusion to the GUS reporter protein <sup>42</sup>.

320

### 321 **Experimental setup and (pre-)treatments**

322 Ethylene treatments: Lids of the agar plates of the vertically grown seedlings were removed  
323 during all (pre-) treatments and plates were placed vertically into glass desiccators (22.5 L  
324 volume). Air (control) and ~5 $\mu\text{ll}^{-1}$  ethylene (pre-) treatments (by injection with a syringe) were  
325 applied at the start of the light period (9:00 for seedlings, 8:00 for adult rosettes) and were  
326 performed by keeping the seedlings/plants in air-tight closed glass desiccators under low light  
327 conditions (T= 20°C, Light intensity= ~3-5  $\mu\text{mol m}^{-2}\text{s}^{-1}$ ) for 4 hours. Ethylene concentrations in  
328 all desiccators were verified by gas chromatography (Syntech Spectras GC955) at the beginning  
329 and end of the pre-treatment.

330 Hypoxia treatments: After 4 hours of any pre-treatment plants/seedlings were flushed with  
331 oxygen-depleted air (humidified 100% N<sub>2</sub> gas) at a rate of 2.00 l/min under dark conditions to

332 limit oxygen production by photosynthesis. Oxygen levels generally reached 0.00% oxygen  
333 within 40 minutes of the hypoxia treatment as measured with a Neofox oxygen probe (Ocean  
334 optics, Florida, USA) (Supplementary Figure 7c). Control plants and seedlings were flushed with  
335 humidified air condition for the duration of the hypoxia treatment in the dark. Hypoxia treatment  
336 durations varied depending on the developmental stage and plant species and are specified in the  
337 appropriate figure legends.

338 Nitric oxide: Just before application, pure NO gas was diluted in small glass vials with pure N<sub>2</sub>  
339 gas to minimize the oxidation of NO gas. Diluted NO gas was injected with a syringe into the air  
340 and ethylene treated desiccators at a final concentration of 10  $\mu\text{l}^{-1}$  NO, 1 hour prior to the end of  
341 the (pre-)treatment.

342 c-PTIO: Treatments with the NO-scavenger 2-(4-Carboxyphenyl)-4,5-dihydro-4,4,5,5-  
343 tetramethyl-1H-imidazol-1-yloxy-3-oxide potassium salt (c-PTIO salt, Sigma Aldrich,  
344 Darmstadt, Germany) were performed 1 hour prior to ethylene treatments to allow for treatment  
345 combinations. Droplets of 5  $\mu\text{l}$  c-PTIO solution (250  $\mu\text{M}$  in autoclaved liquid  $\frac{1}{4}$  MS) or mock  
346 solution (autoclaved liquid  $\frac{1}{4}$  MS) were pipetted onto each individual root tip.

347 1-MCP: Seedlings were placed in closed glass desiccators (22.5l volume) and gassed with 5  $\mu\text{l}^{-1}$   
348 1-MCP (Rohmand Haas) for 1 hour prior to other (pre-) treatments.

349 Submergence: For submergence (pre-) treatments, the plates of vertically grown seedlings were  
350 placed horizontally and were carefully filled with autoclaved tap water until the seedlings were  
351 fully submerged.

352

### 353 **Hypoxia tolerance assays**

354 Adult rosette plants: 10-leaf stage plants received ethylene and air pre-treatments followed by  
355 several durations of hypoxia and were subsequently placed back under short day growth chamber  
356 conditions to recover. After 7 days of recovery survival rates and biomass (fresh and dry weight  
357 of surviving plants) were determined.

358 Root tip survival of seedlings: 5-day old seedlings grown vertically on agar plates received pre-  
359 treatments (described above) followed by several durations of hypoxia (generally 4 hours for  
360 mutant analysis). After the hypoxia treatment, agar plates were closed and sealed again with  
361 Leukopor tape and the location of root tips was marked at the back of the agar plate using a  
362 marker pen (0.8mm fine tip). Plates were then placed back vertically under short day growth

363 conditions for recovery. After 3-4 days of recovery, seedling root tips were scored as either alive  
364 or dead based on clear root tip re-growth beyond the line on the back of the agar plate. Primary  
365 root tip survival was calculated as the percentage of seedlings that showed root tip re-growth out  
366 of a row of (maximally) 23 seedlings. Root tip survival was expressed as relative survival  
367 compared to control plates that received similar pre-treatments but no hypoxia. For *Solanum*  
368 *lycopersicum* (Tomato, Moneymaker), *Solanum dulcarama* and *Arabidopsis lyrata* methods  
369 were similar as described above, but seedlings were 7 days old. For *Hordeum vulgare* (Barley,  
370 both ssp. Golden Promise and landrace Heimdal) seedlings were only 3 days old and received 20  
371 hours of hypoxia before scoring survival of whole seedlings after 3 days of recovery.

#### 372 Evans blue staining for cell viability in root tips

373 *Arabidopsis* seedlings were taken for root cell integrity analysis by Evans blue staining after air  
374 and ethylene pre-treatments followed by both hypoxia and post-hypoxia time-points. Seedlings  
375 were incubated in 0.25% aqueous Evans blue staining solution for 15 minutes in the dark,  
376 subsequently washed three times with Milli-Q water to remove excess dye and finally imaged  
377 using light microscopy (OLYMPUS BX50WI, 10x objective). Evans blue area and pixel  
378 intensity of the microscopy images was analyzed using ICY software  
379 (<http://icy.bioimageanalysis.org/>), by quantifying the mean pixel intensity of the red (ch0) and  
380 blue (ch2) channels of the tissues of interest, and expressed as Blue/Red pixel intensity.

381

#### 382 **RNA extraction and quantification, cDNA synthesis and RT-qPCR**

383 Adult rosette (2 whole rosettes per sample), whole seedling (~20 whole seedlings) or seedling  
384 root tip (~500 root tips) samples were harvested by snap freezing in liquid nitrogen. Total sample  
385 RNA was extracted from frozen pulverized tissue using the RNeasy Plant Mini Kit protocol  
386 (Qiagen, Dusseldorf, Germany) with on-column DNase treatment Kit (Qiagen, Dusseldorf,  
387 Germany) and quantified using a NanoDrop ND-1000 UV-Vis spectrophotometer (Nanodrop  
388 Technology). Single-stranded cDNA was synthesized from 500 ng RNA using random hexamer  
389 primers (Invitrogen, Waltham, USA). qRT-PCR was performed using the Applied Biosystems  
390 ViiA 7 Real-Time PCR System (Thermo Fisher Scientific) with a 5µl reaction mixture  
391 containing 2.5µl 2× SYBR Green MasterMix (Bio-Rad, Hercules, USA), 0.25µL of both 10µM  
392 forward and reverse primers and 2µl cDNA (5ng/µl). Average sample CT values were derived  
393 from 2 technical replicates. Relative transcript abundance was calculated using the comparative



394 CT method <sup>43</sup>, fold change was generally expressed as fold change relative to air treated samples  
395 of Col-0. *ADENINE PHOSPHORIBOSYL TRANSFERASE 1 (APT1)* was amplified, stable in all  
396 treatments and used as a reference gene. Primers used for RT-qPCR can be found in Table S2.

397

### 398 **Histochemical staining for GUS activity**

399 Seedlings of *promRAP2.12:RAP2.12-GUS* (10 days old) were harvested in GUS solution  
400 (100mM NaPO<sub>4</sub> buffer, pH 7.0, 10mM EDTA, 2mM X-Gluc, 500 μM K<sub>3</sub>Fe(CN)<sub>6</sub> and 500 μM  
401 K<sub>4</sub>Fe(CN)<sub>6</sub>) directly after (indicated in figure legend) treatments, vacuum infiltrated for 15  
402 minutes and incubated for 2 days at 37°C before de-staining with 70% ethanol. Seedlings were  
403 kept and mounted in 50% glycerol and analyzed using a Zeiss Axioskop2 DIC (differential  
404 interference contrast) microscope (10× DIC objective) or regular light microscope with a  
405 Lumenera Infinity 1 camera. GUS pixel intensity of the microscopy images was analyzed using  
406 ICY software (<http://icy.bioimageanalysis.org/>), by quantifying the pixel intensity of the red  
407 (ch0) and blue (ch2) channels of the tissues of interest relative to the respective channel  
408 background values of these images. GUS intensity of all treatments was expressed relatively to  
409 the Air-treated controls.

410

### 411 **Protein extraction, SDS-PAGE and Western Blotting**

412 Protein was extracted on ice for 30 minutes from pulverized snap frozen samples in modified  
413 RIPA lysis buffer containing 50 mM HEPES-KOH pH (7.8), 100 mM KCl, 5 mM EDTA (pH 8),  
414 5 mM EGTA (pH 8), 50 mM NaF, 10% (v/v) glycerol, 1% (v/v) IGEPAL, 0.5% (w/v)  
415 deoxycholate, 0.1% (w/v) SDS, 1 mM Na<sub>3</sub>VO<sub>4</sub> (sodium orthovanadate), 1 mM PMSF, 1x  
416 proteinase inhibitor cocktail (Roche), 1x PhosSTOP Phosphatase Inhibitor Cocktail (Roche) and  
417 50μM MG132 <sup>44</sup>. Protein concentration was quantified using and following the protocol of a  
418 BCA protein assay kit (Pierce). Protein concentrations were equalized by dilution with RIPA  
419 buffer and incubated for 10 minutes with loading buffer (5x sample loading buffer, Bio Rad) + β-  
420 ME) at 70°C before loading (30 μg total protein per sample) on pre-cast Mini-PROTEAN Stain  
421 Free TGX Gels (Bio Rad) and ran by SDS-PAGE. Gels were imaged before and after  
422 transferring to PVDF membranes (Bio Rad) using trans-blot turbo transfer system (Bio Rad), to  
423 verify successful and equal protein transfer. Blots were blocked for at least 1 hour in blocking  
424 solution at RT (5% milk in 1xTBS) before probing with primary antibody in blocking solution

425 ( $\alpha$ -HA-HRP, 1:2500 (Roche);  $\alpha$ -PGB1, 1:500 (produced for this study using full length protein  
426 as antigen by GenScript);  $\alpha$ -Actin, 1:2500 (Thermo Scientific) overnight at 4°C. Blots were  
427 rinsed 3 times with 1xTBS-T (0.1% Tween 20) for 10 minutes under gentle agitation before  
428 probing with secondary antibody ( $\alpha$ -rabbit IgG-HRP for PGB1, 1:3000;  $\alpha$ -mouse IgG-HRP for  
429 Actin, 1:2500) and/or SuperSignal™ West Femto chemiluminescence substrate (Fisher  
430 Scientific) and blot imaging using Image Lab software in a chemi-gel doc (Bio-rad) with custom  
431 accumulation sensitivity settings for optimal contrast between band detection and background  
432 signal. To visualize RAP2.3 (~45 kDa) and ACTIN (~42 kDa) protein levels on the same blot,  
433 membranes were stripped after taking final blot images using a mild stripping buffer (pH 2.2,  
434 1.5% (w/v) glycine, 0.1% SDS and 1.0% Tween 20) for 15 minutes and rinsed 3x in 1xTBS-T  
435 before blocking and probing with the 2<sup>nd</sup> primary antibody of interest.

436

### 437 **NO quantification**

438 Intracellular NO levels were visualized using DAF-FM diacetate (7'-difluorofluorescein  
439 diacetate, Bio-Connect). Seedlings were incubated in the dark for 15 min under gentle agitation  
440 in 10mM Tris-HCl buffer (pH 7.4) containing 50 $\mu$ M DAF-FM DA and subsequently washed  
441 twice for 5 min 10mM Tris-HCl buffer (pH 7.4). Several roots of all treatments/genotypes were  
442 mounted in 10mM Tris-HCl buffer (pH 7.4) on the same microscope slide. Fluorescence was  
443 visualized using a Zeiss Observer Z1 LSM700 confocal microscope (oil immersion, 40x  
444 objective Plan-Neofluar N.A. 1.30) with excitation at 488 nm and emission at 490-555 nm. Roots  
445 incubated and mounted in 10mM Tris-HCl buffer (pH 7.4) without DAF-FM DA were used to  
446 set background values where no fluorescence was detected. Within experiments, laser power,  
447 pinhole, digital gain and detector offset were identical for all samples. Mean DAF-FM DA  
448 fluorescence pixel intensity in root tips was determined in similar areas of ~17000  $\mu$ m<sup>2</sup> between  
449 epidermis layers using ICY software (<http://icy.bioimageanalysis.org/>).

450

### 451 **Confocal Microscopy**

452 Transgenic Arabidopsis seedlings of *35S:EIN3-GFP* and *35S:RAP2.12-GFP* and were fixed in  
453 4% PFA (pH 6.9) right after treatments, kept under gentle agitation for 1h, were subsequently  
454 washed twice for 1 min in 1 x PBS and stored in ClearSee clearing solution (xylytol 10% (w/v),  
455 sodium deoxycholate 15% (w/v) and urea 25% (w/v)<sup>45</sup>. Seedlings were transferred to 0.01%

456 Calcofluor White (in ClearSee solution) 24 hours before imaging. Fluorescence was visualized  
457 using a Zeiss Observer Z1 LSM700 confocal microscope (oil immersion, 40x objective Plan-  
458 Neofluar N.A. 1.30) with excitation at 488nm and emission at 490-555nm for GFP and  
459 excitation at 405 nm and emission at 400-490 nm for Calcofluor White. Within experiments,  
460 laser power, pinhole, digital gain and detector offset were identical for all samples. Mean GFP  
461 fluorescence pixel intensity in root tips was determined in similar areas of  $\sim 17000 \mu\text{m}^2$  between  
462 epidermis layers using ICY software (<http://icy.bioimageanalysis.org/>).

463

#### 464 **Nitrate reductase activity assay**

465 The NR activity was assessed using a mix of 20 whole 10-day-old seedlings with 2 replicates per  
466 treatment. Snap frozen samples were ground and homogenized in extraction buffer (100mM  
467 HEPES (pH7.5), 2mM EDTA, 2mM di-thiothreitol, 1% PVPP). After centrifugation at 30.000g  
468 at 4C for 20 min, supernatants were collected and added to the reaction buffer (100mM HEPES  
469 (pH7.5), 100mM NaNO<sub>3</sub>, 10mM Cysteine, 2mM NADH and 2mM EDTA). The reaction was  
470 stopped by the addition of 500mM zinc acetate after incubation for 15min at 25°C. Total nitrite  
471 accumulation was determined following addition of 1% sulfanilamide in 1.5M HCl and 0.02%  
472 naphthylethylenediamine dihydrochloride (NNEDA) in 0.2M HCl by measuring the absorbance  
473 of the reaction mixture at 540 nm.

474

#### 475 **Statistical analyses**

476 No statistical methods were used to predetermine sample size. Samples were taken from  
477 independent biological replicates. In general, the sample size of experiments was maximized and  
478 dependent on technical, space and/or time limitations. For root tip survival assay, the maximum  
479 amount of seedlings used per biological replicate, generally 1 row of seedlings for in vitro agar  
480 plates, is mentioned in the appropriate figure legends. Data was plotted using Graphpad Prism  
481 software. The statistical tests were performed two-sided, using R software and the “LSmeans and  
482 “multmultcompView” packages. Survival data was analyzed with either a generalized linear  
483 modeling (GLM) approach or an ANOVA on arcsin transformation of the surviving fraction. A  
484 negative binomial error structure was used for the GLM. Arcsin transformation ensured a  
485 homogeneity and normal distribution of the variances, especially for data that did not have  
486 treatments with all living or all death responses. The remaining data were analyzed with either

487       Students t-test, 1-way or 2-way ANOVAs. Here data were log transformed if necessary to adhere  
488       to ANOVA prerequisites. Multiple comparisons were corrected for with Tukey's HSD.

489

490 **References:**

- 491 1. Hirabayashi, Y. *et al.* Global flood risk under climate change. *Nat. Clim. Chang.* **3**, 816–  
492 821 (2013).
- 493 2. Voeselek, L. A. C. J. & Bailey-Serres, J. Flood adaptive traits and processes: an  
494 overview. *New Phytol.* **206**, 57–73 (2015).
- 495 3. Shiono, K., Takahashi, H., Colmer, T. D. & Nakazono, M. Role of ethylene in  
496 acclimations to promote oxygen transport in roots of plants in waterlogged soils. *Plant*  
497 *Sci.* **175**, 52–58 (2008).
- 498 4. Sasidharan, R. *et al.* Signal Dynamics and Interactions during Flooding Stress. *Plant*  
499 *Physiol.* **176**, 1106–1117 (2018).
- 500 5. Voeselek, L. A. C. J. & Sasidharan, R. Ethylene - and oxygen signalling - drive plant  
501 survival during flooding. *Plant Biol.* **15**, 426–435 (2013).
- 502 6. CHEN, Y.-F., ETHERIDGE, N. & SCHALLER, G. E. Ethylene Signal Transduction.  
503 *Ann. Bot.* **95**, 901–915 (2005).
- 504 7. Xie, L. J. *et al.* Unsaturation of Very-Long-Chain Ceramides Protects Plant from  
505 Hypoxia-Induced Damages by Modulating Ethylene Signaling in Arabidopsis. *PLoS*  
506 *Genet.* **11**, 1–33 (2015).
- 507 8. Chang, K. N. *et al.* Temporal transcriptional response to ethylene gas drives growth  
508 hormone cross-regulation in Arabidopsis. *Elife* **2**, e00675 (2013).
- 509 9. An, F. *et al.* Ethylene-Induced Stabilization of ETHYLENE INSENSITIVE3 and EIN3-  
510 LIKE1 Is Mediated by Proteasomal Degradation of EIN3 Binding F-Box 1 and 2 That  
511 Requires EIN2 in Arabidopsis. *Plant Cell Online* **22**, 2384–2401 (2010).
- 512 10. Veen, H. van *et al.* Two Rumex Species from Contrasting Hydrological Niches Regulate  
513 Flooding Tolerance through Distinct Mechanisms. *Plant Cell* **25**, 4691–4707 (2013).
- 514 11. Mustroph, A. *et al.* Cross-Kingdom Comparison of Transcriptomic Adjustments to Low-  
515 Oxygen Stress Highlights Conserved and Plant-Specific Responses. *Plant Physiol.* **152**,  
516 1484–1500 (2010).
- 517 12. Gibbs, D. J. *et al.* Homeostatic response to hypoxia is regulated by the N-end rule  
518 pathway in plants. *Nature* **479**, 415–418 (2011).
- 519 13. Licausi, F. *et al.* Oxygen sensing in plants is mediated by an N-end rule pathway for  
520 protein destabilization. *Nature* **479**, 419–422 (2011).

- 521 14. Gibbs, D. J. *et al.* Nitric Oxide Sensing in Plants Is Mediated by Proteolytic Control of  
522 Group VII ERF Transcription Factors. *Mol. Cell* **53**, 369–379 (2014).
- 523 15. White, M. D. *et al.* Plant cysteine oxidases are dioxygenases that directly enable arginyl  
524 transferase-catalysed arginylation of N-end rule targets. *Nat. Commun.* **8**, 14690 (2017).
- 525 16. Tasaki, T., Sriram, S. M., Park, K. S. & Kwon, Y. T. The N-End Rule Pathway. *Annu.*  
526 *Rev. Biochem.* **81**, 261–289 (2012).
- 527 17. Gibbs, D. J. *et al.* Group VII Ethylene Response Factors Coordinate Oxygen and Nitric  
528 Oxide Signal Transduction and Stress Responses in Plants. *Plant Physiol.* **169**, 23–31  
529 (2015).
- 530 18. Licausi, F. *et al.* Oxygen sensing in plants is mediated by an N-end rule pathway for  
531 protein destabilization. *Nature* **479**, 419–422 (2011).
- 532 19. Vicente, J. *et al.* The Cys-Arg/N-End Rule Pathway Is a General Sensor of Abiotic Stress  
533 in Flowering Plants. *Curr. Biol.* **27**, 3183-3190.e4 (2017).
- 534 20. Hinz, M. *et al.* Arabidopsis RAP2.2: An Ethylene Response Transcription Factor That Is  
535 Important for Hypoxia Survival. *Plant Physiol.* **153**, 757–772 (2010).
- 536 21. Gasch, P. *et al.* Redundant ERF-VII Transcription Factors Bind to an Evolutionarily  
537 Conserved cis-Motif to Regulate Hypoxia-Responsive Gene Expression in Arabidopsis.  
538 *Plant Cell* **28**, 160–180 (2016).
- 539 22. Bui, L. T., Giuntoli, B., Kosmacz, M., Parlanti, S. & Licausi, F. Constitutively expressed  
540 ERF-VII transcription factors redundantly activate the core anaerobic response in  
541 Arabidopsis thaliana. *Plant Sci.* **236**, 37–43 (2015).
- 542 23. Licausi, F. *et al.* HRE1 and HRE2, two hypoxia-inducible ethylene response factors,  
543 affect anaerobic responses in Arabidopsis thaliana. *Plant J.* **62**, 302–315 (2010).
- 544 24. Mendiondo, G. M. *et al.* Enhanced waterlogging tolerance in barley by manipulation of  
545 expression of the N-end rule pathway E3 ligase PROTEOLYSIS6. *Plant Biotechnol. J.* **14**,  
546 40–50 (2016).
- 547 25. Weits, D. A. *et al.* An apical hypoxic niche sets the pace of shoot meristem activity.  
548 *Nature* **569**, 714–717 (2019).
- 549 26. Shukla, V. *et al.* Endogenous Hypoxia in Lateral Root Primordia Controls Root  
550 Architecture by Antagonizing Auxin Signaling in Arabidopsis. *Mol. Plant* **12**, 538–551  
551 (2019).

- 552 27. Gibbs, D. J. *et al.* Oxygen-dependent proteolysis regulates the stability of angiosperm  
553 polycomb repressive complex 2 subunit VERNALIZATION 2. *Nat. Commun.* **9**, 5438  
554 (2018).
- 555 28. Planchet, E. & Kaiser, W. M. Nitric oxide (NO) detection by DAF fluorescence and  
556 chemiluminescence: A comparison using abiotic and biotic NO sources. *J. Exp. Bot.* **57**,  
557 3043–3055 (2006).
- 558 29. Gupta, K. J., Hebelstrup, K. H., Mur, L. A. J. & Igamberdiev, A. U. Plant hemoglobins:  
559 Important players at the crossroads between oxygen and nitric oxide. *FEBS Lett.* **585**,  
560 3843–3849 (2011).
- 561 30. Chamizo-Ampudia, A., Sanz-Luque, E., Llamas, A., Galvan, A. & Fernandez, E. Nitrate  
562 Reductase Regulates Plant Nitric Oxide Homeostasis. *Trends Plant Sci.* **22**, 163–174  
563 (2017).
- 564 31. Hebelstrup, K. H. *et al.* Haemoglobin modulates NO emission and hyponasty under  
565 hypoxia-related stress in *Arabidopsis thaliana*. *J. Exp. Bot.* **63**, 5581–5591 (2012).
- 566 32. Loreti, E., Valeri, M. C., Novi, G. & Perata, P. Gene Regulation and Survival under  
567 Hypoxia Requires Starch Availability and Metabolism. *Plant Physiol.* **176**, 1286–1298  
568 (2018).
- 569 33. Schmidt, R. R. *et al.* Low-oxygen response is triggered by an ATP-dependent shift in  
570 oleoyl-CoA in *Arabidopsis*. *Proc. Natl. Acad. Sci. U. S. A.* **115**, E12101–E12110 (2018).
- 571 34. Igamberdiev, A. U. & Hill, R. D. Elevation of cytosolic Ca<sup>2+</sup> in response to energy  
572 deficiency in plants: the general mechanism of adaptation to low oxygen stress. *Biochem.*  
573 *J.* **475**, 1411–1425 (2018).
- 574 35. Holdsworth, M. J. First hints of new sensors. *Nat. Plants* 1–2 (2017). doi:10.1038/s41477-  
575 017-0031-7
- 576 36. Mira, M. M., Hill, R. D. & Stasolla, C. Phytoglobins Improve Hypoxic Root Growth by  
577 Alleviating Apical Meristem Cell Death. *Plant Physiol.* **172**, 2044–2056 (2016).
- 578 37. Rivera-Contreras, I. K. *et al.* Transcriptomic analysis of submergence-tolerant and  
579 sensitive *Brachypodium distachyon* ecotypes reveals oxidative stress as a major tolerance  
580 factor. *Sci. Rep.* **6**, 1–15 (2016).
- 581 38. Armstrong, W., Beckett, P. M., Colmer, T. D., Setter, T. L. & Greenway, H. Tolerance of  
582 roots to low oxygen: ‘anoxic’ cores, the phytoglobin-nitric oxide cycle, and energy or

- 583 oxygen sensing. *J. Plant Physiol.* (2019). doi:10.1016/J.JPLPH.2019.04.010
- 584 39. Alonso, J. M., Hirayama, T., Roman, G., Nourizadeh, S. & Ecker, J. R. EIN2, a  
585 bifunctional transducer of ethylene and stress responses in Arabidopsis. *Science* (80-. ).  
586 (1999). doi:10.1126/science.284.5423.2148
- 587 40. Alonso, J. M. *et al.* Five components of the ethylene-response pathway identified in a  
588 screen for weak ethylene-insensitive mutants in Arabidopsis. *Proc. Natl. Acad. Sci. U. S.*  
589 *A.* **100**, 2992–7 (2003).
- 590 41. Hebelstrup, K. H., Hunt, P., Dennis, E., Jensen, S. B. & Jensen, E. Ø. Hemoglobin is  
591 essential for normal growth of Arabidopsis organs. *Physiol. Plant.* **127**, 157–166 (2006).
- 592 42. NAKAGAWA, T. *et al.* Improved Gateway Binary Vectors: High-Performance Vectors  
593 for Creation of Fusion Constructs in Transgenic Analysis of Plants. *Biosci. Biotechnol.*  
594 *Biochem.* **71**, 2095–2100 (2007).
- 595 43. Livak, K. J. & Schmittgen, T. D. Analysis of Relative Gene Expression Data Using Real-  
596 Time Quantitative PCR and the  $2^{-\Delta\Delta CT}$  Method. *Methods* **25**, 402–408 (2001).
- 597 44. Zhang, H. *et al.* N-terminomics reveals control of Arabidopsis seed storage proteins and  
598 proteases by the Arg/N-end rule pathway. *New Phytol.* **218**, 1106–1126 (2018).
- 599 45. Ursache, R., Andersen, T. G., Marhavý, P. & Geldner, N. A protocol for combining  
600 fluorescent proteins with histological stains for diverse cell wall components. *Plant J.* **93**,  
601 399–412 (2018).

602

### 603 **Acknowledgements**

604 We thank the following individuals for providing seeds of these genotypes: Angelika Mustroph  
605 for Ler-0, Col-0 x Ler-0 WT crosses, *rap2.2*, *rap2.12* and *rap2.2 rap2.12-A & B*, Francesco  
606 Licausi for *35S:δ13-RAP2.12-GFP* and *35S:RAP2.12-GFP*, Shi Xiao for *35S:EIN3-GFP* and  
607 Frank Becker for *Arabidopsis lyrata* seeds. We acknowledge Sophie Berckhan, Ankie  
608 Ammerlaan, Rob Welschen, Tamara Le Thanh, Johanna Kociemba, Florian de Deugd and Joris  
609 te Riele for technical assistance. Finally, we thank Ronald Pierik for feedback on the manuscript  
610 and Kasper van Gelderen and Jesse Küpers for their input on confocal imaging. This work was  
611 supported by grants from the Netherlands Organization for Scientific Research (831.15.001 to  
612 S.H., 824.14.007 to L.A.C.J.V, S.M. and BB.00534.1 to R.S.) and the Biotechnology and  
613 Biological Sciences Research Council [BB/M007820/1 and BB/K000144/1] to M.J.H.



614

615 **Author information and contributions**

616 Authors declare no competing interests. Correspondence and requests for materials should be  
617 addressed to \*L.a.c.j.voesenek@uu.nl (L.A.C.J.V.), \*R.sasidharan@uu.nl (R.S.) and  
618 \*Michael.Holdsworth@nottingham.ac.uk (M.J.H.). S.H, Z.L, H.v.V, J.V.C, H.Z, E.J.W.V, J.B.S,  
619 F.L.T, K.H.H, D.J.G, M.J.H, R.S. and L.A.C.J.V. designed experiments; S.H, Z.L, J.V.C, E.R,  
620 S.M, H.Z, N.v.D, F.B, G.W.B and E.J.W.V performed experiments; S.H, M.J.H, R.S. and  
621 L.A.C.J.V. wrote the manuscript.

622

623 **Data and materials availability:** No restrictions are placed on materials and data availability.  
624 Biological materials such as mutant/transgenic lines can be requested from the corresponding  
625 authors. Details of all data and materials used in the analysis are available in the main text or the  
626 supplementary materials. Gene accession numbers of all the Arabidopsis genes/mutants used in  
627 this study are listed in the Method section and Supplementary Table 1 and 2.

628

629 **Supplementary Information**

630 Supplementary files include:

631 Supplementary figures.

632 Supplementary Tables 1 and 2. List of accessions used with genotyping primers (Supplementary  
633 Table 1) and RT-qPCR primers (Supplementary Table 2).

634

635

## Supplementary Figures

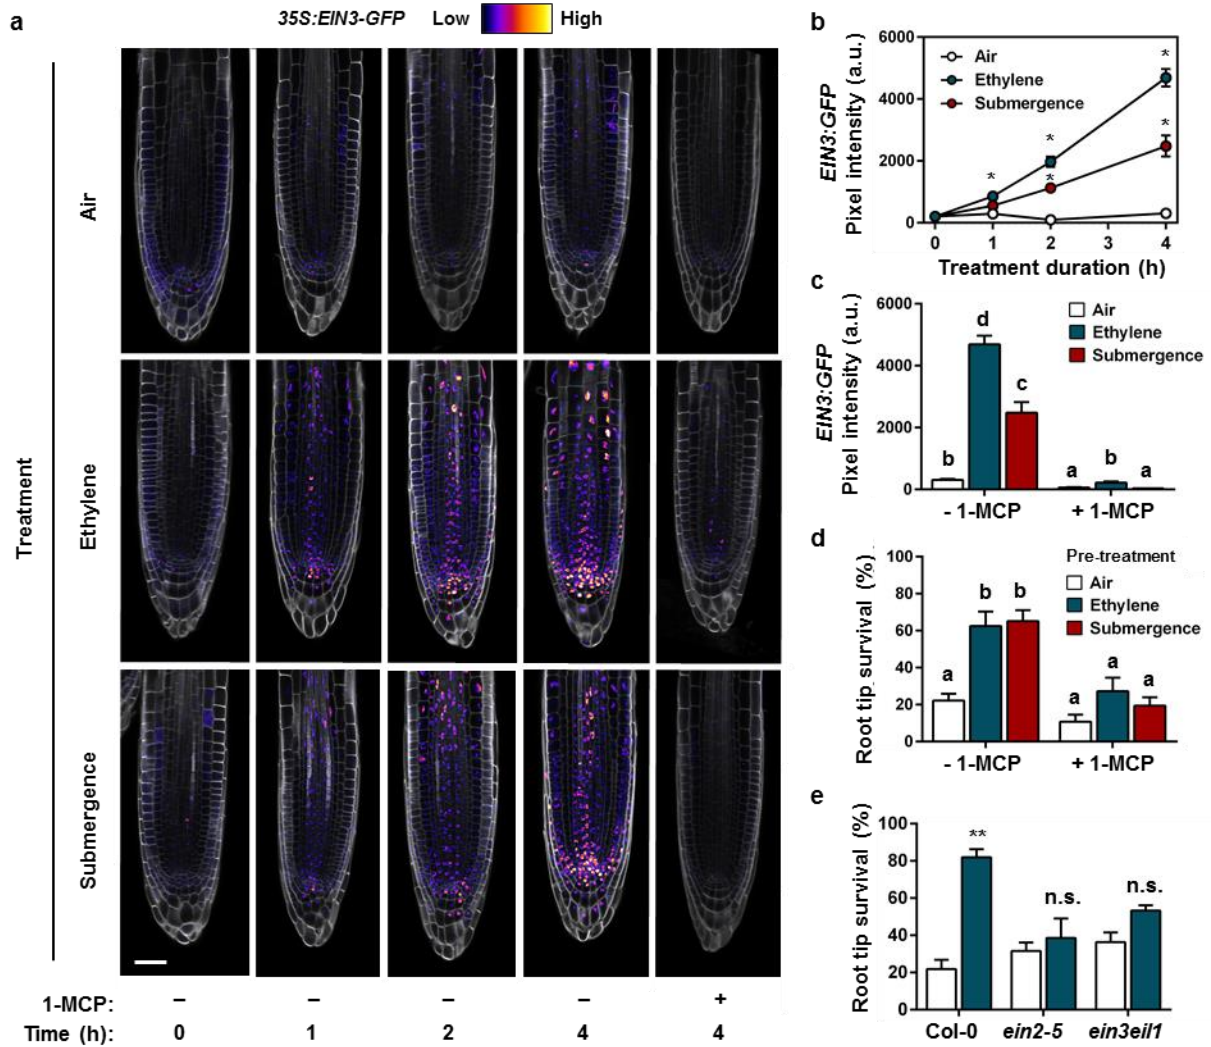

636

637

### Supplementary Figure 1. Ethylene signalling upon early submergence and its functional implications for subsequent hypoxia acclimation

638

(a) Representative confocal images of protein stability and localization of the ethylene master regulator EIN3, using the 35S::EIN3-GFP (*ein3eil1* double mutant background) signal in Arabidopsis root tips. Seedlings were treated for up to 4 hours with air,  $\sim 5\mu\text{l l}^{-1}$  ethylene or submergence, either in combination with or without a pre-treatment of ethylene action inhibitor 1-MCP at the 4 hour time-point. Cell walls were visualized using Calcofluor White stain (scale bar= 50 $\mu\text{m}$ ). (b) Quantification of 35S::EIN3-GFP in root tips during 4 hours of treatment with air (white),  $\sim 5\mu\text{l l}^{-1}$  ethylene (blue) or submergence (red). Mean GFP pixel intensity inside the root tips was quantified using ICY imaging software. Asterisks indicate a significant difference

639

640

641

642

643

644

645

646

647 from the air mean per time-point (Error bars are SEM,  $p < 0.05$ , ANOVA with planned  
648 comparisons, Tukey's HSD correction for multiple comparisons,  $n = 5-12$  roots). **(c)**  
649 Quantification of *35S::EIN3-GFP* (*ein3eil1* double mutant background) in root tips after 4 hours  
650 of treatment with air (white),  $\sim 5 \mu\text{l}^{-1}$  ethylene (blue) or submergence (red), either in combination  
651 with or without a pre-treatment of ethylene action inhibitor 1-MCP. Mean GFP pixel intensity  
652 inside the root tips was quantified using ICY imaging software. Samples without 1-MCP are the  
653 same as in Supplementary Figure. 1b at  $t = 4\text{h}$ . Statistically similar groups are indicated using the  
654 same letter (Error bars are SEM,  $p < 0.05$ , 2-way ANOVA, Tukey's HSD,  $n = 5-11$  roots). **(d)**  
655 Seedling root tip survival of Col-0 after 4 hours of pre-treatment with air (white),  $\sim 5 \mu\text{l}^{-1}$   
656 ethylene (blue) or submergence (red), either in combination with or without a pre-treatment of  
657 ethylene action inhibitor 1-MCP, followed by 4 hours of hypoxia and 3 days of recovery. Values  
658 are relative to control (normoxia) plants. Statistically similar groups are indicated using the same  
659 letter (Error bars are SEM,  $p < 0.05$ , Generalized linear model with negative binomial error  
660 structure,  $n = 8$  rows of  $\sim 23$  seedlings). **(e)** Seedling root tip survival of Col-0 and two ethylene  
661 signaling pathway loss-of-function mutants after 4 hours of pre-treatment with air (white) or  
662  $\sim 5 \mu\text{l}^{-1}$  ethylene (blue) followed by 4 hours of hypoxia and 3 days of recovery. Values are  
663 relative to control (normoxia) plants. Asterisks indicate significant differences between air and  
664 ethylene (Error bars are SEM,  $p < 0.01$ , Generalized linear model with negative binomial error  
665 structure,  $n = 4-6$  rows of  $\sim 46$  seedlings). Experiments were replicated at least 2 times.  
666

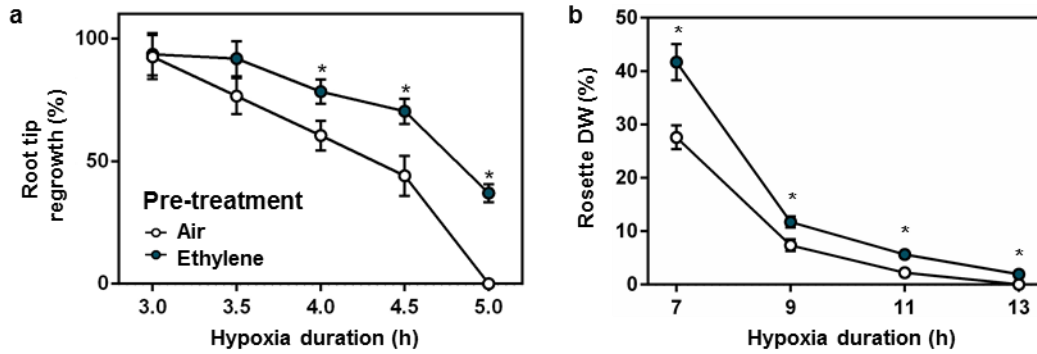

667

668

669 **Supplementary Figure 2. Ethylene pre-treatment improves performance of recovering**  
670 **tissues of survived plants after subsequent hypoxia**

671 **(a)** Seedling root tip regrowth capacity of surviving roots after 4 hours of pre-treatment with air  
672 (white) or  $\sim 5\mu\text{l l}^{-1}$  ethylene (blue) followed by hypoxia and 3 days of recovery. Values are  
673 relative to control (normoxia) plants. Asterisks indicate significant differences between air and  
674 ethylene at given time point (Error bars are SEM,  $*p < 0.05$ , Student's *t* test,  $n = 4-8$  lines of 23  
675 seedlings for survival,  $n = 5-35$  surviving roots for regrowth). **(b)** Rosette dry weight (DW) of  
676 adult Col-0 plants after 4 hours of pre-treatment with air (white) or  $\sim 5\mu\text{l l}^{-1}$  ethylene (blue)  
677 followed by hypoxia and 7 days of recovery. DW was measured only from surviving plants.  
678 Values are relative to control (normoxia) plants. Asterisks indicate significant differences  
679 between air and ethylene at given time point (Error bars are SEM,  $*p < 0.05$ , Student's *t* test,  $n = 30$   
680 plants). Experiments were replicated at least 3 times.

681

682

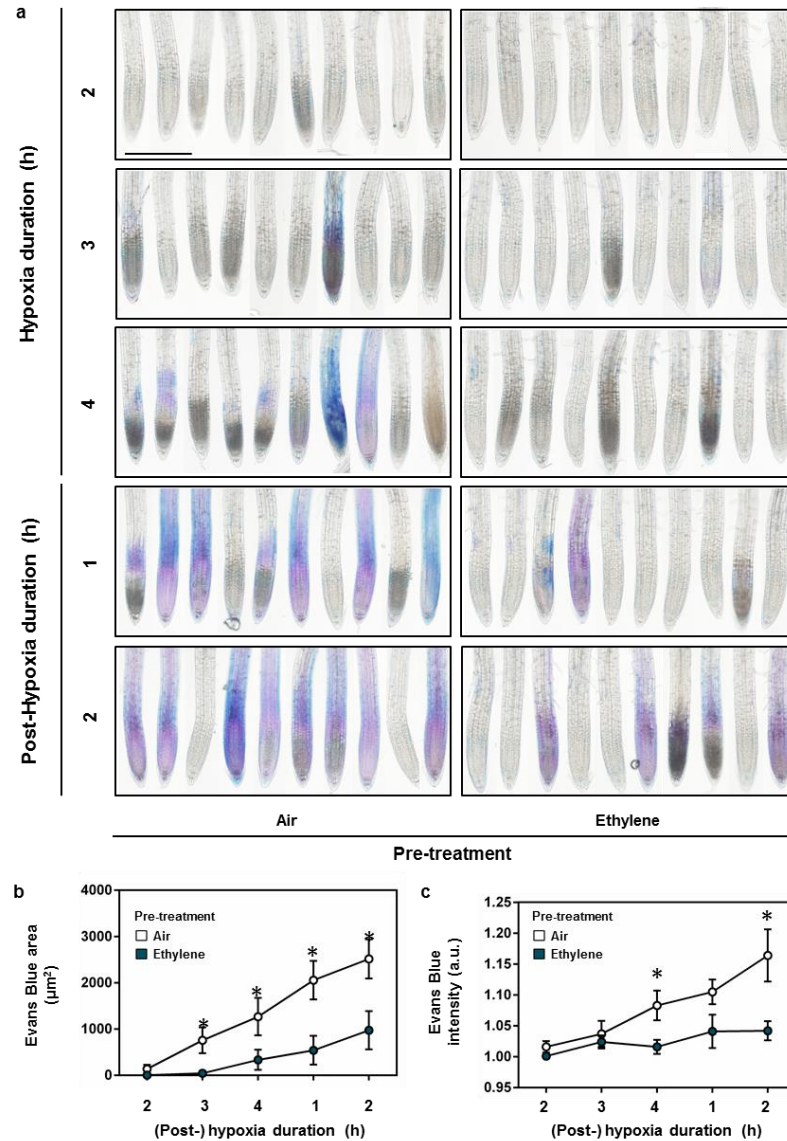

683

684

### Supplementary Figure 3. Ethylene pre-treated seedlings show reduced cell damage in root tips during subsequent hypoxia and recovery treatments

685

686

(a) Representative light microscopy images of Evans blue staining for impaired cell membrane integrity in seedling root tips after 4 hours of pre-treatment with air or  $\sim 5\mu\text{l}^{-1}$  ethylene followed by 2-4h hypoxia (scale bar = 2mm). (b, c) Quantification of the area (b) and pixel intensity (c) of Evans blue staining in seedling root tips after 4 hours of pre-treatment with air (white) or  $\sim 5\mu\text{l}^{-1}$  ethylene (blue) followed by 2-4h hypoxia and 1-2h of recovery. Asterisks indicate significant differences between air and ethylene at given time point (Error bars are SEM,  $*p < 0.05$ , Student's t test,  $n = 10$  root tips). Experiments were replicated at least 2 times.

687

688

689

690

691

692

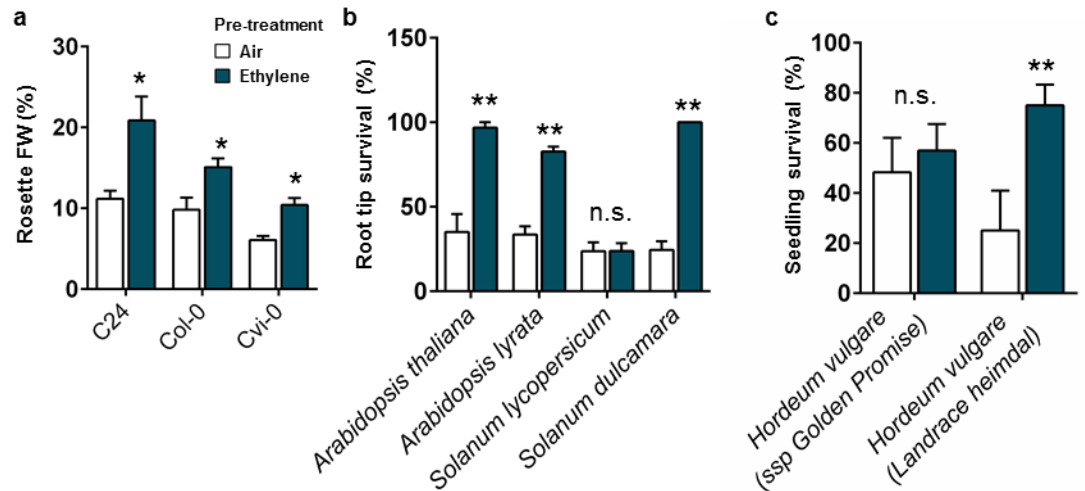

693

694

**Supplementary Figure 4. Ethylene-induced hypoxia tolerance is conserved within Arabidopsis accessions and shows variation between other plant species**

695

696

(a) Relative rosette fresh weight (FW) of adult Arabidopsis accessions C24, Col-0 and Cvi-0 plants after 4 hours of pre-treatment with air (white) or  $\sim 5\mu\text{l l}^{-1}$  ethylene (blue) followed by 9 hours of hypoxia and 7 days of recovery. FW was measured only from survived plants (Error bars are SEM,  $*p < 0.05$ , Student's *t* test,  $n = 10$  plants). (b) Root tip survival of 4 different plant species after 4 hours of pre-treatment with air (white) or  $\sim 5\mu\text{l l}^{-1}$  ethylene (blue) followed by 4 hours of hypoxia and 3 days of recovery. Asterisks indicate significant differences between air and ethylene (Error bars are SEM,  $**p < 0.01$ , Generalized linear model with negative binomial error structure,  $n = 4-6$  lines consisting of 10-46 seedlings depending on species). (c) Plant survival of 2 different varieties of Barley (*Hordeum vulgare*) seedlings after 4 hours of pre-treatment with air (white) or  $\sim 5\mu\text{l l}^{-1}$  ethylene (blue) followed by 20 hours of hypoxia and 3 days of recovery. Asterisks indicate significant differences between air and ethylene (Error bars are SEM,  $*p < 0.05$ , Generalized linear model with negative binomial error structure,  $n = 4-6$  replicates consisting of 3 seedlings). Experiments were replicated at least 2 times, except for a, which was only performed once.

707

708

709

710

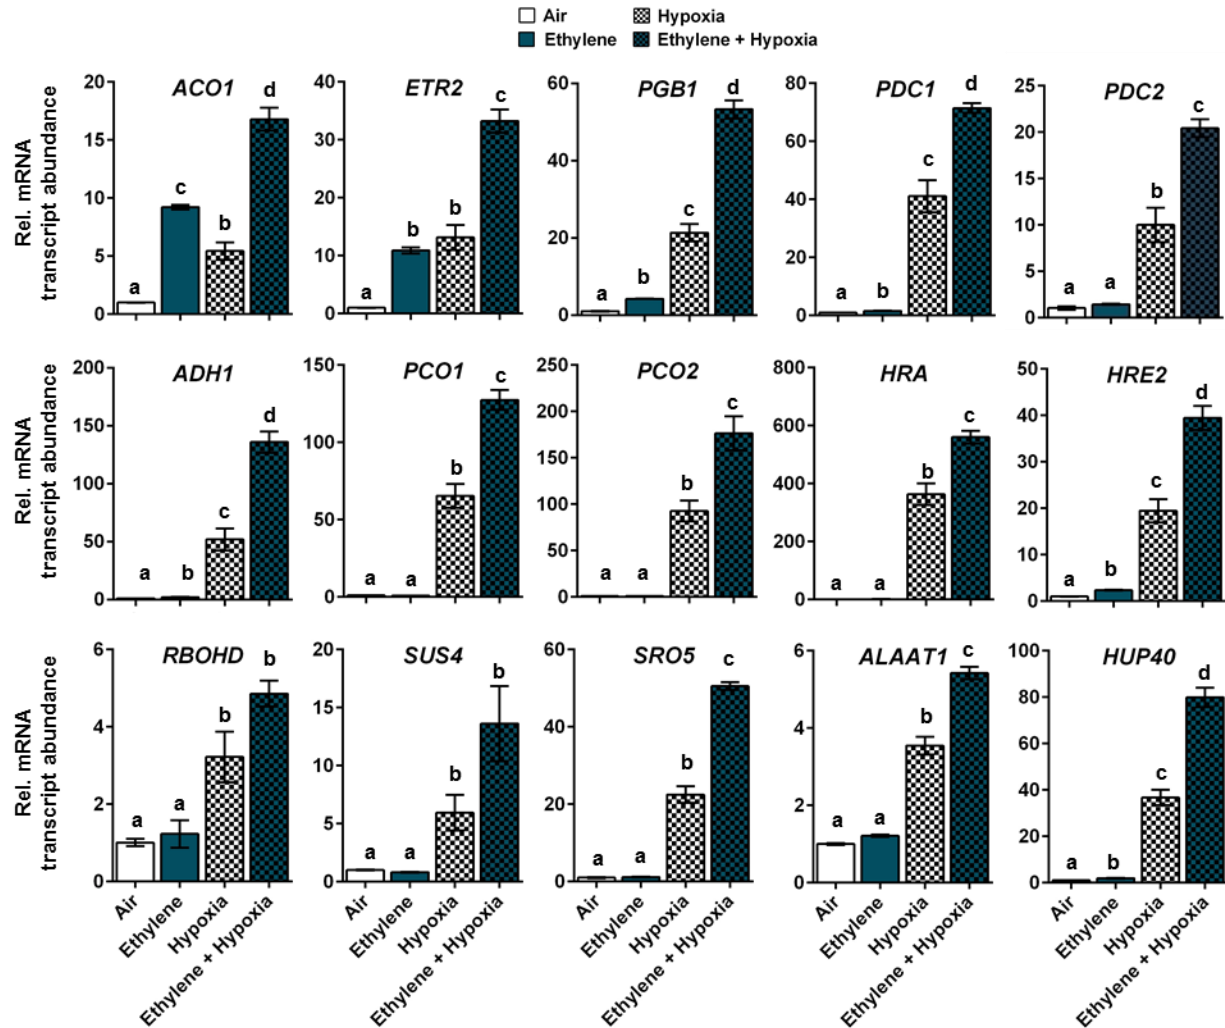

711

712

713 **Supplementary Figure 5. Ethylene pre-treatment bolsters hypoxia adaptive gene**  
 714 **transcripts upon hypoxia**

715 Relative mRNA transcript abundance of 15 hypoxia adaptive genes in seedling root tips of Col-0  
 716 after 4 hours of pre-treatment with air (white) or  $\sim 5\mu\text{l l}^{-1}$  ethylene (blue), followed by (4h)  
 717 hypoxia (blocks). Values are relative to Col-0 air treated samples. Different letters indicate  
 718 significant differences (Error bars are SEM,  $p < 0.05$ , 1-way ANOVA, Tukey's HSD,  $n = 3-4$   
 719 replicates of  $\sim 400$  root tips). Experiments were replicated at least 2 times.

720

721

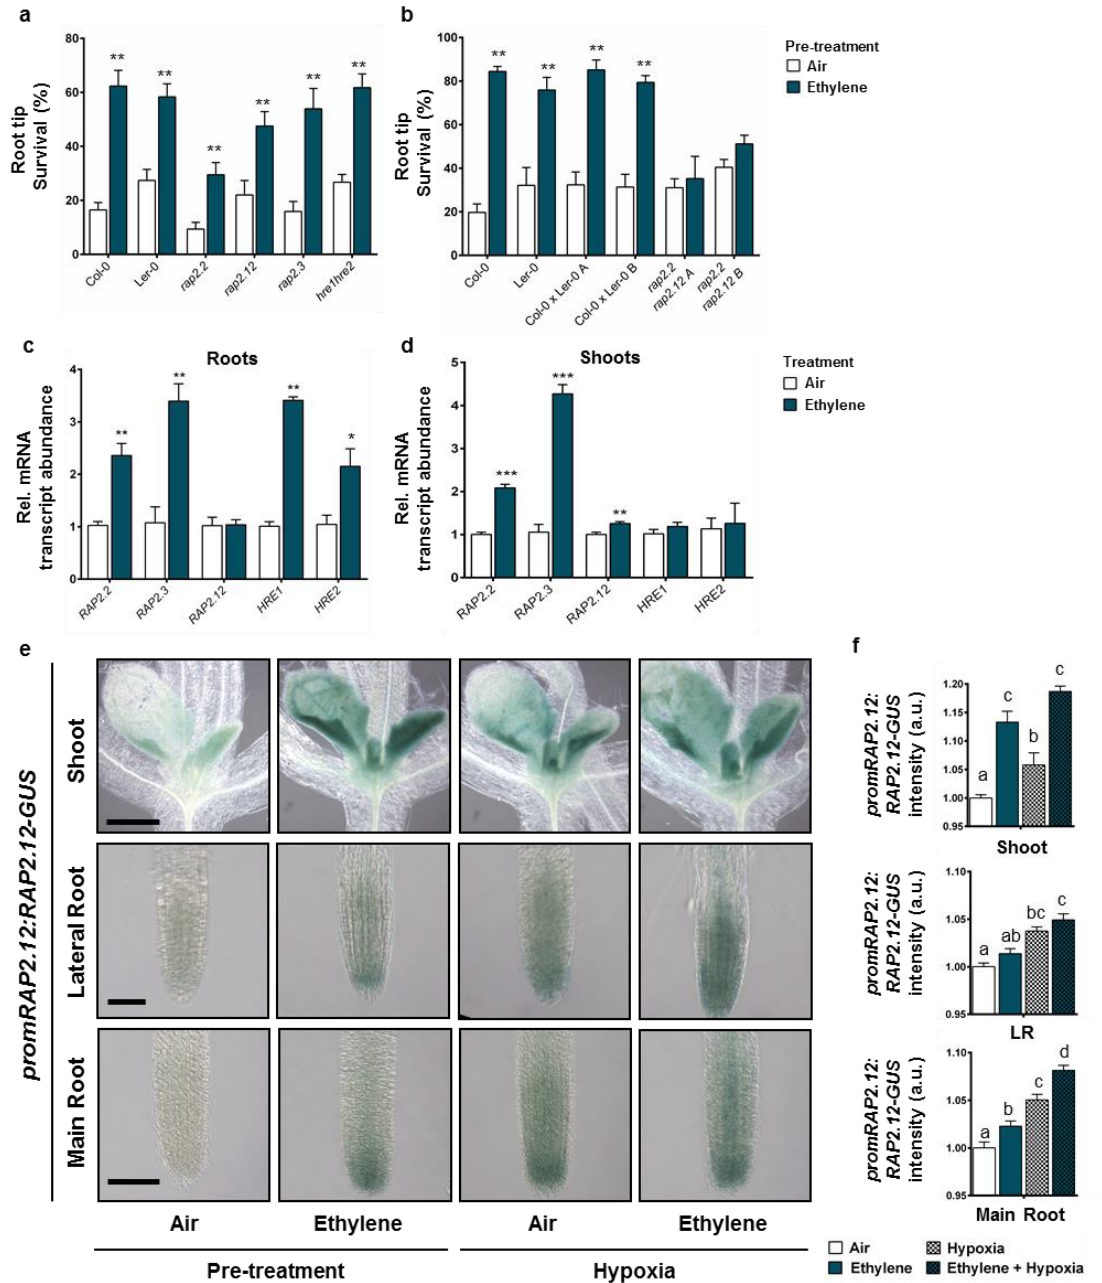

722

723

724

### Supplementary Figure 6. The involvement and regulation of ERFVII for ethylene-induced hypoxia tolerance

725

(a, b) Seedling root tip survival of Col-0, Ler-0, ERFVII mutants *rap2.2* (Ler-0 background), *rap2.12*, *rap2.3* and *hre1hre2* (Col-0 background) in a, and Col-0, Ler-0, 2 Col-0 x Ler-0 WT crosses and ERFVII double mutants *rap2.2rap2.12* (2 independent lines in Col-0 x Ler-0 background) in b, after 4 hours of pre-treatment with air (white) or  $\sim 5\mu\text{l l}^{-1}$  ethylene (blue) followed by 4 hours of hypoxia and 3 days of recovery. Values are relative to control (normoxia)

729



730 plants. Asterisks indicate significant differences between air and ethylene (Error bars are SEM,  
731 \*\* $p < 0.01$ , Generalized linear model with negative binomial error structure,  $n = 4-21$  rows  
732 consisting of  $\sim 23$  seedlings for a,  $n = 8$  rows consisting of  $\sim 23$  seedlings for b). **(c, d)** Relative  
733 mRNA transcript abundance of all 5 ERFVIIIs in root tips of Col-0 seedlings (c) and adult  
734 rosettes (d) after 4 hours of treatment with air (white) or  $\sim 5 \mu\text{l l}^{-1}$  ethylene (blue). Asterisks  
735 indicate significant differences between air and ethylene (Error bars are SEM, \* $p < 0.05$ ,  
736 \*\* $p < 0.01$ , \*\*\* $p < 0.001$ , Generalized linear model with negative binomial error structure,  $n = 3-4$   
737 replicates containing  $\sim 400$  root tips for c,  $n = 5$  replicates of 2 rosettes for d). **(e, f)** Representative  
738 DIC microscopy images (e) and quantification (f) of *promRAP2.12::RAP2.12-GUS* in seedling  
739 shoots, lateral roots and main root tips after 4 hours of treatment with air (white) or  $\sim 5 \mu\text{l l}^{-1}$   
740 ethylene (blue) or subsequent (4h) hypoxia (block pattern). Scale bars; shoot =  $180 \mu\text{m}$ , lateral  
741 root =  $60 \mu\text{m}$ , main root =  $100 \mu\text{m}$ . Values are relative to air treated samples. Statistically similar  
742 groups are indicated using the same letter per tissue (Error bars are SEM,  $p < 0.05$ , 1-way  
743 ANOVA, Tukey's HSD,  $n = 5-20$  replicates). Experiments were replicated at least 2 times.

744

745

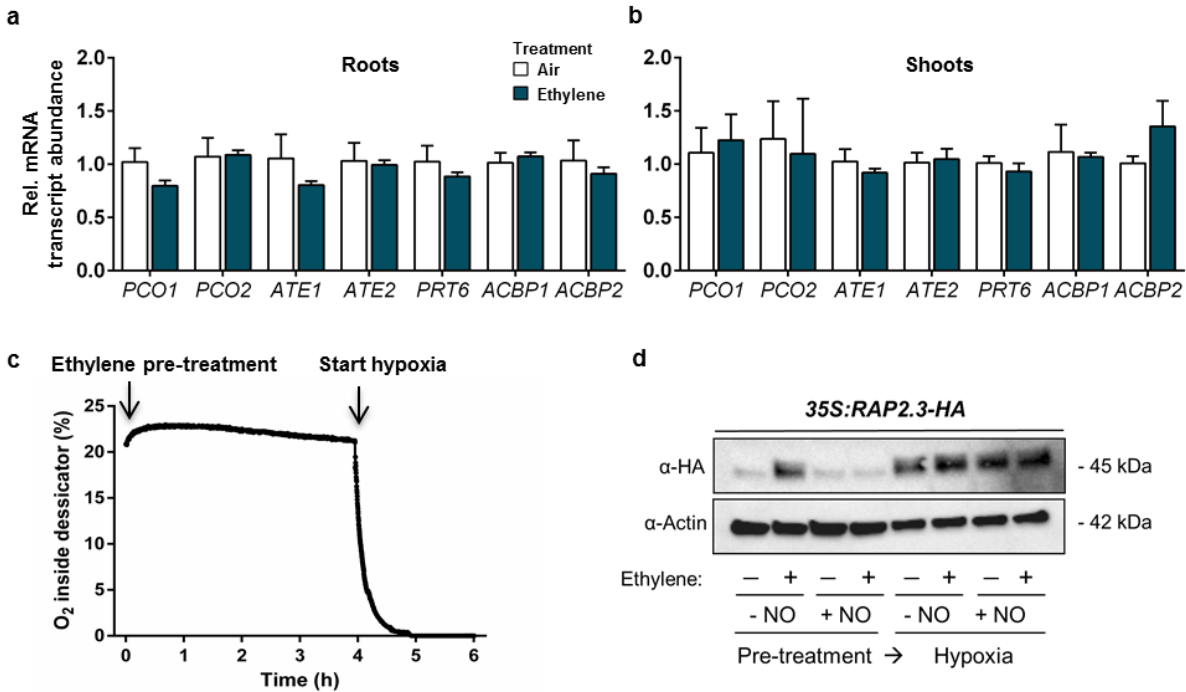

746

747

### Supplementary Figure 7. The effects of ethylene on processes that regulate ERFVII stability

748

749

(a, b) Relative mRNA transcript abundance of genes coding for enzymes involved in the PRT6 N-degron pathway or RAP2.12-sequestering proteins *ACBP1* and *ACBP2* in root tips of Col-0 seedlings (a) and adult rosettes (b) after 4 hours of treatment with air (white) or  $\sim 5\mu\text{l l}^{-1}$  ethylene (blue). Values are relative to Col-0 air treated samples. No significant differences were found between air and ethylene (Error bars are SEM, Student's t test,  $n=3-4$  replicates containing  $\sim 400$  root tips for a,  $n=5$  replicates of 2 rosettes for b). (c) Levels of molecular oxygen measured over time at the outflow of the desiccators during the ethylene pre-treatment and subsequent hypoxia treatments in this study. Oxygen levels generally reached  $<0.00\%$  between 40 and 50 minutes of flushing the desiccators with humidified 99.996%  $\text{N}_2$  at a rate of  $2\text{ l min}^{-1}$ . (d) RAP2.3 protein levels in *35S::MC-RAP2.3-HA* seedlings (Col-0 background) after air and ethylene pre-treatments (4h), combined with or without an additional NO pulse and subsequent hypoxia (4h). Experiments were replicated at least 2 times, except for d, in which the hypoxia treatment after NO manipulation was only performed once.

762

763

764

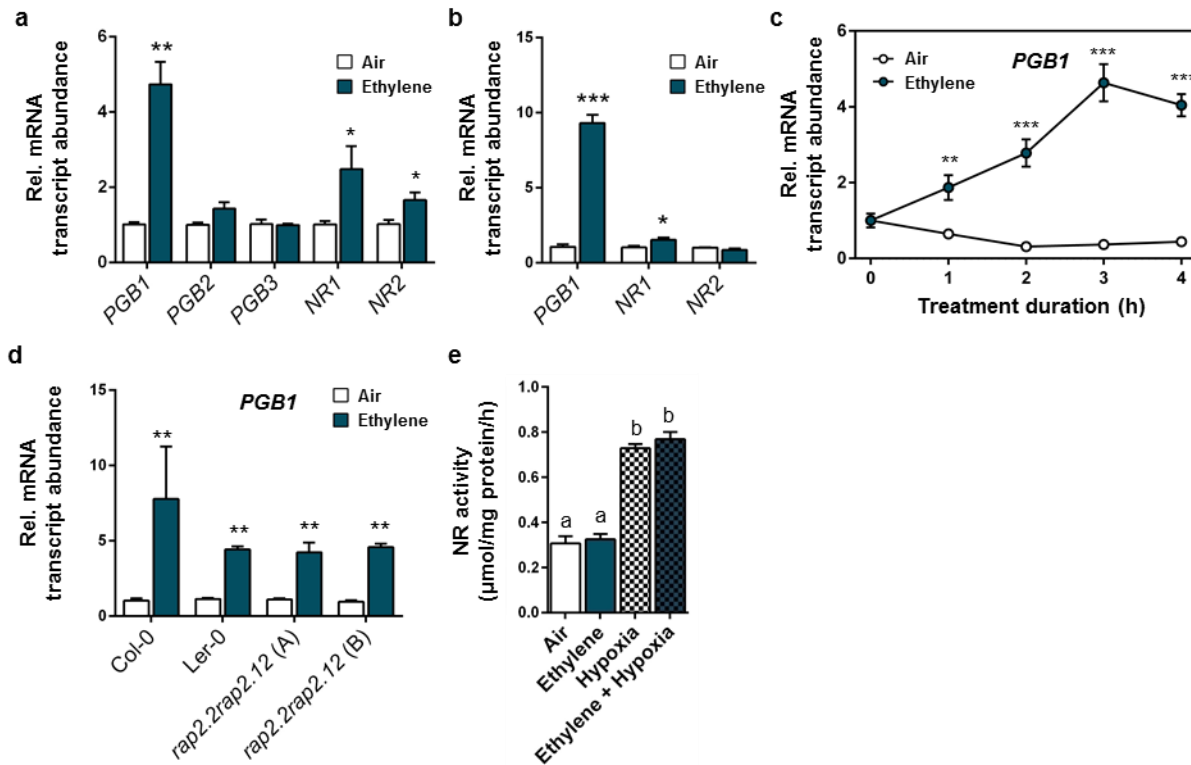

765

766

767

**Supplementary Figure 8. The effects of ethylene on *PHYTOGLOBIN* transcript abundance and *NITRATE REDUCTASE* transcript abundance and activity**

768

(a) Relative mRNA transcript abundance of genes involved in NO metabolism in seedling root

769

tips of Col-0 after 4 hours of treatment with air (white) or  $\sim 5 \mu\text{l l}^{-1}$  ethylene (blue). Values are

770

relative to Col-0 air treated samples. Asterisks indicate significant differences between air and

771

ethylene (Error bars are SEM, \* $p < 0.05$ , \*\* $p < 0.01$ , Student's  $t$  test,  $n = 3-4$  biological replicates of

772

$\sim 00$  root tips). (b) Relative mRNA transcript abundance of genes coding for enzymes involved in

773

NO metabolism in rosettes of Col-0 plants after 4 hours of treatment with air (white) or  $\sim 5 \mu\text{l l}^{-1}$

774

ethylene (blue). Values are relative to Col-0 air treated samples. Asterisks indicate significant

775

differences between air and ethylene (Error bars are SEM, \*\*\* $p < 0,001$ , \* $p < 0,05$  Student's  $t$  test,

776

$n = 5$  biological replicates of 2 rosettes). (c) Relative *PGB1* mRNA transcript abundance in

777

rosettes of Col-0 plants during 4 hours of treatment with air (white) or  $\sim 5 \mu\text{l l}^{-1}$  ethylene (blue).

778

Asterisks indicate significant differences between air and ethylene (Error bars are SEM,

779

\*\*\* $p < 0,001$ , ANOVA with planned comparisons, Tukey's HSD correction for multiple

780

comparisons,  $n = 5$  biological replicates of 2 rosettes). (d) Relative *PGB1* mRNA transcript

781

abundance in seedlings of Arabidopsis Col-0 and Ler-0 WT, and 2 double *rap2.2rap2.12*

782 mutants (Col-0 x Ler-0 background) after 4 hours of treatment with air (white) or  $\sim 5\mu\text{l l}^{-1}$   
783 ethylene (blue). Values are relative to Col-0 air treated samples. Asterisks indicate significant  
784 differences between air and ethylene (Error bars are SEM,  $**p < 0.01$ , ANOVA with planned  
785 comparisons, Tukey's HSD correction for multiple comparisons,  $n=2$  biological replicates of  
786  $\sim 400$  root tips). (e) Nitrate reductase activity in whole Col-0 WT seedlings after 4 hours of pre-  
787 treatment with air (white) or  $\sim 5\mu\text{l l}^{-1}$  ethylene (blue), followed by (4h) hypoxia (blocks).  
788 Statistically similar groups are indicated using the same letter (Error bars are SEM,  $p < 0.05$ , 1-  
789 way ANOVA, Tukey's HSD,  $n=2$  biological replicates of  $\sim 200$  seedlings). Experiments were  
790 replicated at least 2 times, except for e, which was only performed once.

791

792

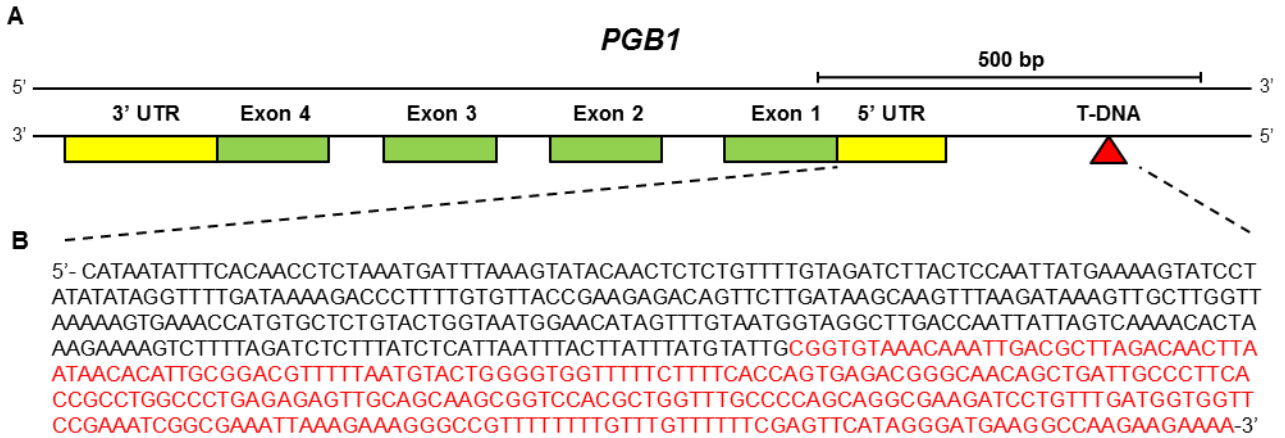

793

794

### Supplementary Figure 9. Identification of *pgb1-1* mutant line *SK\_058388*

795

(a) Schematic map of genomic *PGB1* gene region including the 4 *PGB1* exons (green) and the

796

location of the T-DNA insertion (red triangle) of *pgb1-1* line *SK\_058388*. (b) Partial DNA

797

sequencing reaction of *pgb1-1* aligned with genomic *PGB1* gene region. The aligned native

798

*PGB1* sequence (black) ends and the T-DNA sequence (red) starts exactly 300bp upstream of the

799

*PGB1* start codon.

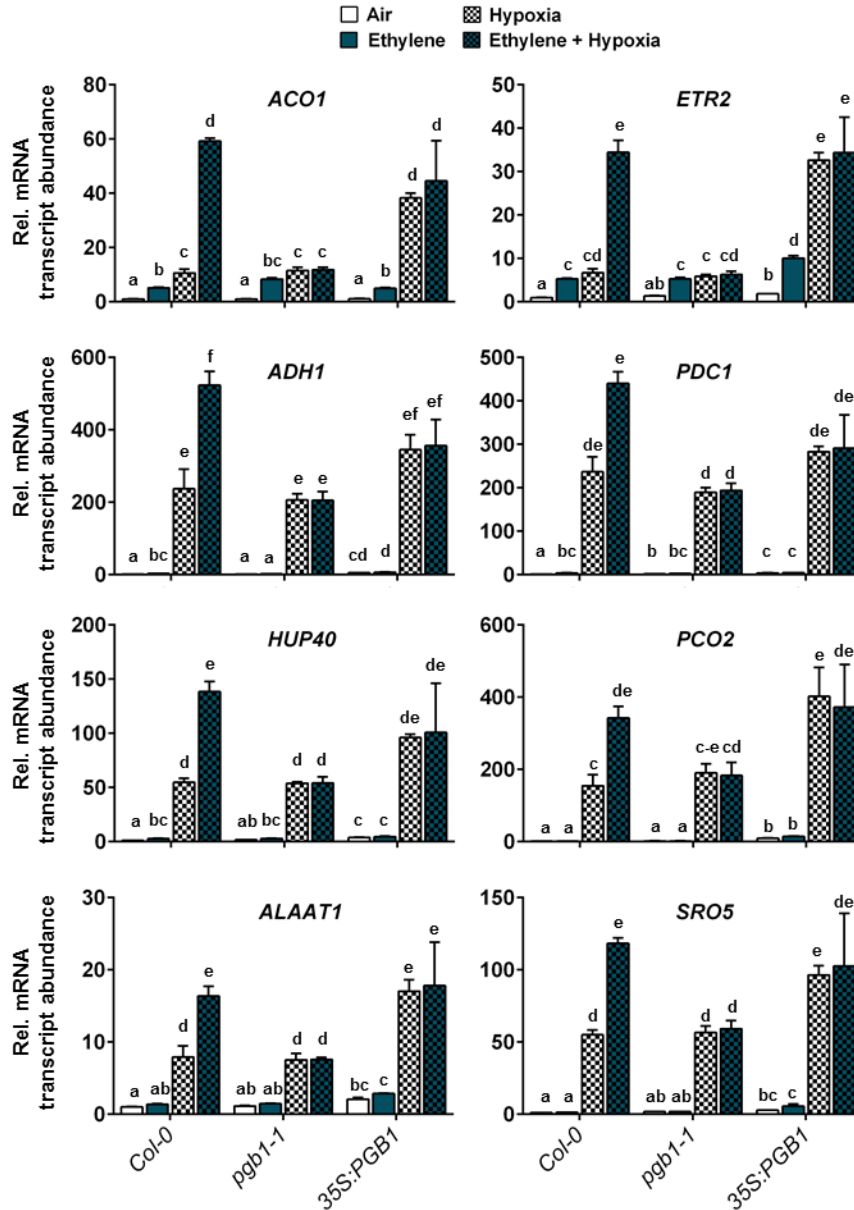

800

801 **Supplementary Figure 10. Hypoxia adaptive gene expression in *PGB1* knock-down and**  
 802 **over-expression lines**

803 Relative mRNA transcript abundance of 8 hypoxia adaptive genes in seedling root tips of Col-0,  
 804 *pgb1-1* and *35S::PGB1* after 4 hours of pre-treatment with air (white) or  $\sim 5\mu\text{l l}^{-1}$  ethylene (blue),  
 805 followed by (4h) hypoxia (blocks). Values are relative to Col-0 air treated samples. Different  
 806 letters indicate significant differences (Error bars are SEM,  $p < 0.05$ , 2-way ANOVA, Tukey's  
 807 HSD,  $n=3$  replicates of  $\sim 200$  root tips).

808

809  
810  
811

**Table S1.**

List of genotyping primers used in this study.

| <b>T-DNA lines</b>               | <b>Primer info</b> | <b>Oligo sequence 5' → 3'</b> | <b>Additional info</b>                                                  |
|----------------------------------|--------------------|-------------------------------|-------------------------------------------------------------------------|
| <i>rap2.2-5 (AY201781)</i>       | WT FW              | ccgcgtcactaacgagtttat         | <i>Gasch et al., 2015</i> <sup>21</sup>                                 |
|                                  | WT REV             | ctccactgggtttctctctc          |                                                                         |
|                                  | T-DNA REV          | cgattaccgtatttatcccg          |                                                                         |
| <i>rap2.12-2 (SAIL_1215_H10)</i> | WT FW              | tcttcgattttgacgctgagt         | <i>Gasch et al., 2015</i> <sup>21</sup>                                 |
|                                  | WT REV             | agggtttgcaccattgtcctgag       |                                                                         |
|                                  | T-DNA REV          | gaatttcataaccaatctcgatacac    |                                                                         |
| <i>rap2.3-1 (SAIL_1031_D10)</i>  | WT FW              | atgtgtggcgggtgctattatt        | <i>Gibbs et al., 2014</i> <sup>14</sup>                                 |
|                                  | WT REV             | ttactcatacgacgcaatgac         |                                                                         |
|                                  | T-DNA REV          | gaatttcataaccaatctcgatacac    |                                                                         |
| <i>hre1 (SALK_039484)</i>        | WT FW              | ttacagacagtggcgaaatca         | <i>Gibbs et al., 2014</i> <sup>14</sup>                                 |
|                                  | WT REV             | tcaggaccatagaccatgt           |                                                                         |
|                                  | T-DNA REV          | atthtggcgatttcggaac           |                                                                         |
| <i>hre2 (SALK_052858)</i>        | WT FW              | tgcaaaagggttatagagcacac       | <i>Gibbs et al., 2014</i> <sup>14</sup>                                 |
|                                  | WT REV             | ggcaaccggaatctgataga          |                                                                         |
|                                  | T-DNA REV          | atthtggcgatttcggaac           |                                                                         |
| <i>prt6-1 (SAIL_1278_H11)</i>    | WT FW              | ggcagaaacatccctgaaag          | <i>Gibbs et al., 2011</i> <sup>12</sup>                                 |
|                                  | WT REV             | gcagcacaacactggagaag          |                                                                         |
|                                  | T-DNA REV          | gaatttcataaccaatctcgatacac    |                                                                         |
| <i>pgb1-1 (SALK_058388)</i>      | WT FW              | aagtgttacgtgagactacgact       | This paper                                                              |
|                                  | WT REV             | cttcggttgggtgcaatctca         |                                                                         |
|                                  | T-DNA REV          | atthtggcgatttcggaac           |                                                                         |
| <i>eil1-1</i>                    | WT FW              | ttgatcgtaatggtccagc           | <i>Alonso et al., 2003</i> <sup>40</sup>                                |
|                                  | WT REV             | atthtgcgtgaggacactg           |                                                                         |
|                                  | Transp.REV         | gtcggccccacactctata           |                                                                         |
| <b>Transgenic lines</b>          | <b>Primer info</b> | <b>Oligo sequence 5' → 3'</b> | <b>Additional info:</b>                                                 |
| <i>35S:PGB1</i>                  | 35S:FW             | ggaagttcatttcattggagagg       | Kanamycin Resistance<br><i>Hebelstrup et al., 2006</i> <sup>41</sup>    |
|                                  | PGB1 REV           | tgacactccaagactcactaca        |                                                                         |
| <i>35S:RAP2.3-HA</i>             | 35S:FW             | ggaagttcatttcattggagagg       | Basta Resistance<br><i>Gibbs et al., 2014</i> <sup>14</sup>             |
|                                  | RAP2.3 REV         | taatcggaaataatagaccgcc        |                                                                         |
| <i>35S:EIN3-GFP</i>              | 35S:FW             | ggaagttcatttcattggagagg       | in <i>ein3eil1-1</i> background<br><i>Xie et al., 2015</i> <sup>7</sup> |
|                                  | EIN3 REV           | atgcttgataaccgcagtca          |                                                                         |
| <i>35S:RAP2.12-GFP</i>           | 35S:FW             | ggaagttcatttcattggagagg       | Kanamycin Resistance                                                    |

|                               |                    |                               |                                           |
|-------------------------------|--------------------|-------------------------------|-------------------------------------------|
|                               | RAP2.12<br>REV     | agggtttgcaccattgtcctgag       | <i>Licausi et al., 2011</i> <sup>13</sup> |
| <b>35S:δ13-RAP2.12-GFP</b>    | 35S:FW             | ggaagttcatttcattggagagg       | Kanamycin<br>Resistance                   |
|                               | RAP2.12<br>REV     | agggtttgcaccattgtcctgag       | <i>Licausi et al., 2011</i> <sup>13</sup> |
| <b>proRAP2.12:RAP2.12-GUS</b> | RAP2.12 FW         | actgaatgggacgctcactgg         | Hygromycin<br>Resistance                  |
|                               | GUS REV            | ccatcagcacgttatcgaat          | This paper                                |
| <b>Other</b>                  | <b>Primer info</b> | <b>Oligo sequence 5' → 3'</b> | <b>Additional info:</b>                   |
| <b>ein2-5</b>                 | WT FW              | cgctcattccagtggcttt           | 7bp deletion                              |
|                               | WT REV             | tggtatattccgtctgcacca         | <i>Alonso et al., 1999</i> <sup>39</sup>  |
| <b>ein3</b>                   | WT FW              | aggaggatgtggagagacaa          | G to A substitution at<br>nt1598          |
|                               | WT REV             | atgcttgataaccgcagtca          | <i>Alonso et al., 2003</i> <sup>40</sup>  |

812



813  
814  
815

**Table S2.**

List of RT-qPCR primers used in this study.

| Target gene    | AT code          | Primer name | Oligo sequence 5' → 3'   |
|----------------|------------------|-------------|--------------------------|
| <i>ACBP1</i>   | <i>AT5G53470</i> | ACBP1_FW    | TGGAGATGCGTTATTGTGA      |
|                |                  | ACBP1_R     | GCGAGAAGGTAAGCGAAG       |
| <i>ACBP2</i>   | <i>AT4G27780</i> | ACBP2_FW    | GTGAGGCGGATTCGCTTGT      |
|                |                  | ACBP2_R     | TGCGGCGGCGGTAGTC         |
| <i>ACO1</i>    | <i>AT2G19590</i> | ACO1_FW     | CCTCAGATGCAGATTGGGAAAGC  |
|                |                  | ACO1_R      | TCATCCATCGTCTTGCTGAGTTCC |
| <i>ADH1</i>    | <i>AT1G77120</i> | ADH1_FW     | GGTCTTGGTGCTGTTGGTTT     |
|                |                  | ADH1_R      | CTCAGCGATCACCTGTTGAA     |
| <i>APT1</i>    | <i>AT1G27450</i> | APT1_FW     | AATGGCGACTGAAGATGTGC     |
|                |                  | APT1_R      | TCAGTGTGCGAGAAGAAGCGT    |
| <i>ATE1</i>    | <i>AT5G05700</i> | ATE1_FW     | TCCTCTCCGTTTCCAGTGGG     |
|                |                  | ATE1_R      | CCACGAGAGTTTCAGAAGCACCAG |
| <i>ATE2</i>    | <i>AT3G11240</i> | ATE2_FW     | AGCAGTAGCAGAAACCGGAGTG   |
|                |                  | ATE2_R      | TTCTTGAACCGCGGTATATCCTTG |
| <i>ETR2</i>    | <i>AT3G23150</i> | ETR2_FW     | TGTTAGATTCTCCGGCGGCTATG  |
|                |                  | ETR2_R      | TTCCCATGAATCAACTGCACCAC  |
| <i>HRA</i>     | <i>AT3G10040</i> | HRA_FW      | CATGACCAACAACCACCGCAAC   |
|                |                  | HRA_R       | TTCTGCTGCTGACTCGGAATCG   |
| <i>HRE1</i>    | <i>AT1G72360</i> | HRE1_FW     | TCCGATGAGCCATTTGTCTTCTCC |
|                |                  | HRE1_R      | CCATCTTCCCAAGGCCTTC      |
| <i>HRE2</i>    | <i>AT2G47520</i> | HRE2_FW     | TTGCTGCCATCAAAATCCGT     |
|                |                  | HRE2_R      | CCCCTGGTTTAGTATCGGCT     |
| <i>NR1</i>     | <i>AT1G77760</i> | NIA1_FW     | CTGAGCTGGCAAATTCCGAAGC   |
|                |                  | NIA1_R      | TGCGTGACCAGGTGTTGTAATC   |
| <i>NR2</i>     | <i>AT1G37130</i> | NIA2_FW     | AACTCGCCGACGAAGAAGGTTG   |
|                |                  | NIA2_R      | GGGTTGTGAAAGCGTTGATGGG   |
| <i>PCO1</i>    | <i>AT5G1512</i>  | PCO1_FW     | ATTGGGTGGTTGATGCTCCAATG  |
|                |                  | PCO1_R      | ATGCATGTTCCC GCCATCTTCC  |
| <i>PCO2</i>    | <i>AT5G39890</i> | PCO2_FW     | TCCCAGCCGAGTTCAGATA      |
|                |                  | PCO2_R      | TCCATCAGCCGGGTACAGTA     |
| <i>PDC1</i>    | <i>AT4G33070</i> | PDC1_FW     | TCGATTGGGTGGTCTGTTGG     |
|                |                  | PDC1_R      | TGTCCTGAACCGTGACTTGG     |
| <i>PDC2</i>    | <i>AT5G54960</i> | PDC2_FW     | TGAAAGCAATCAACACGGCA     |
|                |                  | PDC2_R      | CAGCAGAGACTCTAGAGCCC     |
| <i>PRT6</i>    | <i>AT5G02310</i> | PRT6_FW     | CATATGGAGCCCTTGTTGCAGAG  |
|                |                  | PRT6_R      | TACACCAGTACCAGCACCACAG   |
| <i>RAP2.2</i>  | <i>AT3G14230</i> | RAP2.2_FW   | CCTAGCGTCGTATCCCAGAA     |
|                |                  | RAP2.2_R    | CTCAGATGTGTTGGCTGCTG     |
| <i>RAP2.3</i>  | <i>AT3G16770</i> | RAP2.3_FW   | AACTCACGGCTGAGGAACTCTG   |
|                |                  | RAP2.3_R    | ACGTAACTTGGTTGGTGGGATGG  |
| <i>RAP2.12</i> | <i>AT1G53910</i> | RAP2.12_FW  | ACTGAATGGGACGCTTCACTGG   |

|               |                  |           |                         |
|---------------|------------------|-----------|-------------------------|
|               |                  | RAP2.12_R | AGGGTTTGCACCATTGTCCTGAG |
| <i>SRO5</i>   | <i>AT5G62520</i> | SRO5_FW   | AAGAGGCGGTGCAGATGAAACAC |
|               |                  | SRO5_R    | TTTCGAAACAGAGCACCAACCG  |
| <i>ALAAT1</i> | <i>AT1G17290</i> | ALAAT1_FW | ATTCATGACAGATGGTGCAA    |
|               |                  | ALAAT1_R  | TATTTCAAGACCCCATCCTG    |
| <i>SUS4</i>   | <i>AT3G43190</i> | SUS4_FW   | TTCACCATGGCTAGGCTTGA    |
|               |                  | SUS4_R    | CCACCAAGTTCACCAGTTCG    |
| <i>PGB1</i>   | <i>AT2G16060</i> | HB1_FW    | GGCTCTTGTAGTGAAGTCTTGGA |
|               |                  | HB1_R     | CTTCGTTGTTGGTGCAATCTCA  |
| <i>PGB2</i>   | <i>AT3G10520</i> | HB2_FW    | TGAAGTCCCTCACAACAATCCTA |
|               |                  | HB2_R     | AACGCCGCTTTTGAGATGAA    |
| <i>PGB3</i>   | <i>AT4G32690</i> | HB3_FW    | TGGACGATTCGGTTGACATT    |
|               |                  | HB3_R     | TGGTTTATTGGCTGCGTGTT    |
| <i>HUP40</i>  | <i>AT4G24110</i> | HUP40_FW  | GAAACTTGAGTGCGAGTGTG    |
|               |                  | HUP40_R   | CTCAAACCCAATCTTTTGCT    |
| <i>RBOHD</i>  | <i>AT5G47910</i> | RBOHD_FW  | CTTCTGCAAACAAGCTCTCA    |
|               |                  | RBOHD_R   | GTATCCTGCTGTCTCCCATC    |

816
